# Supplementary material
Source: Elsevier journal article supplement (https://comptes-rendus.academie-sciences.fr/chimie/article/10.1016/j.crci.2012.04.003/file/attach/mmc4.pdf)
Supplement: mmc4 [file mmc4.pdf]

## Supplementary material

### Hexanuclear manganese(III) single-molecule magnets from derivatized salicylamidoximes

José Martínez-Lillo, Lise-Marie Chamoreau, Anna Proust, Michel Verdaguer and Pierre Gouzerh

#### 1. Synthesis of derivatized salicylamidoximes

**1.1. Dimethylsalicylamidoxime (Me<sub>2</sub>N-saoH<sub>2</sub>):** A 2 M solution of dimethylamine in THF (5 mL) was added dropwise to a solution of Cl-saoH<sub>2</sub><sup>a</sup> (0.858 g, 5.0 mmol) in THF (20 mL), which resulted in the precipitation of dimethylammonium chloride. The latter was removed by filtration and the filtrate was concentrated under reduced pressure to afford a brown residue which was dissolved in a 1:4 acetone/H<sub>2</sub>O mixture (50 mL) upon heating at 80 °C. The resulting solution was left undisturbed for crystallization of Me<sub>2</sub>N-saoH<sub>2</sub>. Yield: 30%. Anal. calcd. (found) for C<sub>9</sub>H<sub>12</sub>N<sub>2</sub>O<sub>2</sub>: C 59.9 (59.5), H 6.7 (7.2), N 15.6 (15.3)%. IR (KBr pellet/cm<sup>-1</sup>): 3189m, 3000w, 2954m, 2884m, 1623vs, 1608s, 1579m, 1483vs, 1378vs, 1217m, 1152m, 1074m, 1032m, 955s, 763s, 676m.

**1.2. Diethylsalicylamidoxime (Et<sub>2</sub>N-saoH<sub>2</sub>):** A solution of diethylamine (1.28 mL, 12.0 mmol) in THF (5 mL) was added dropwise to a solution of Cl-saoH<sub>2</sub><sup>a</sup> (1.0 g, 6.0 mmol) in THF (20 mL). A white precipitate of diethylammonium chloride was removed by filtration, then the filtrate was concentrated under reduced pressure to afford a brown-orange oil which was treated by a 1:2 acetone/H<sub>2</sub>O mixture (60 mL) mixture at 80 °C. A small amount of a not yet identified red solid was removed by hot filtration and the filtrate was left undisturbed for crystallization of Et<sub>2</sub>N-saoH<sub>2</sub> as light yellow needles. Yield: 65%. Anal. calcd. (found) for C<sub>11</sub>H<sub>16</sub>N<sub>2</sub>O<sub>2</sub>: C 63.4 (62.7), H 7.7 (7.9), N 13.5 (13.5)%. IR (KBr pellet/cm<sup>-1</sup>): 3220m, 2974m, 2931m, 2872w, 1618s, 1599s, 1508m, 1434m, 1217m, 1156w, 915m, 753s.

<sup>a</sup> Hydroximoyl chloride was prepared according to: J. W. Bode, Y. Hachisu, T. Matura and K. Suzuki, Org. Lett. 5 (2003) 391.

## 2. Molecular structures of compounds **3** and **4**

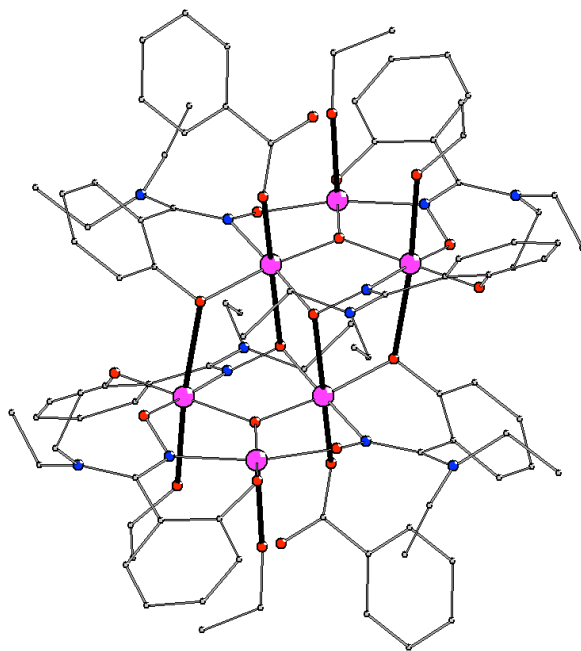

**Fig. S1.** Molecular structure of the  $\{\text{Mn}_6\}$  cluster in **3**, highlighting the elongated bonds as heavy lines. Colour code: Mn, purple; O, red; N, blue; C, black..

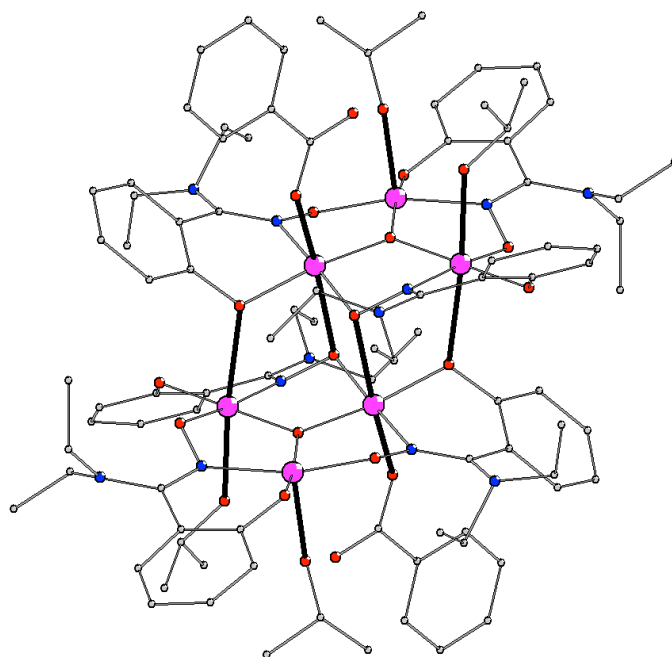

**Fig. S2.** Molecular structure of the  $\{\text{Mn}_6\}$  cluster in **4**. Colour code as in Fig. 1.

### 3. Magnetic data for compounds 1-4

#### Compound 1

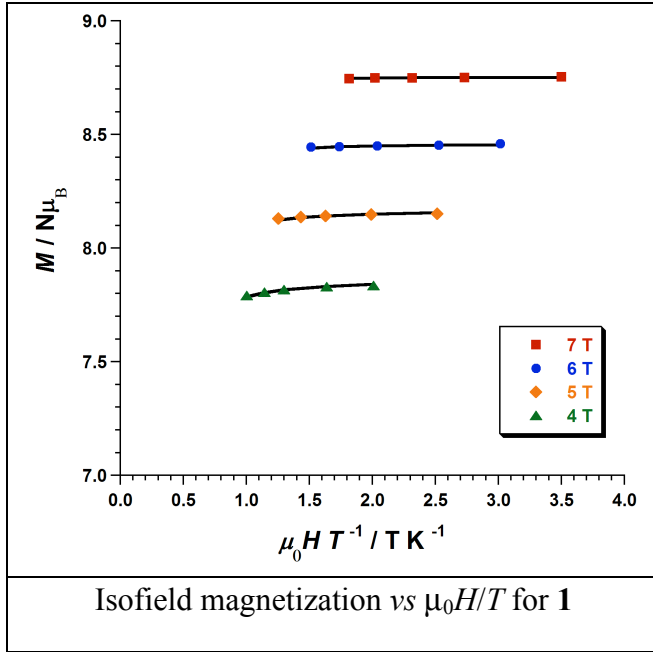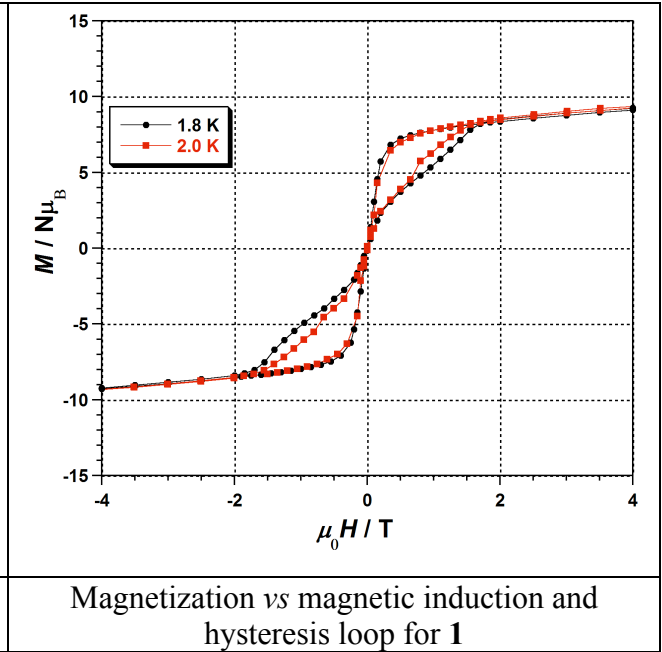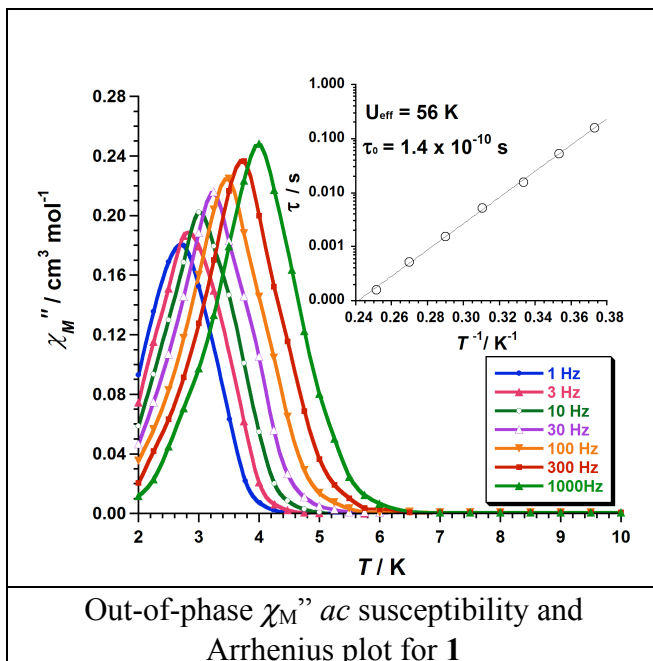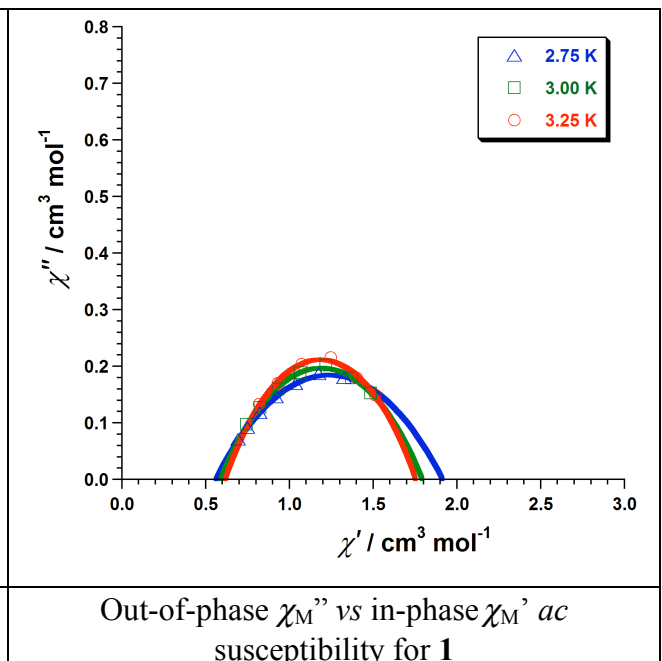

## Compound 2

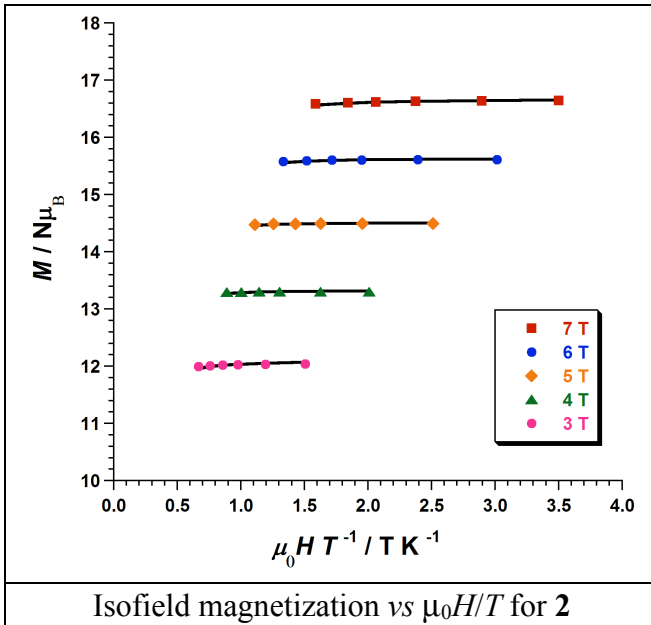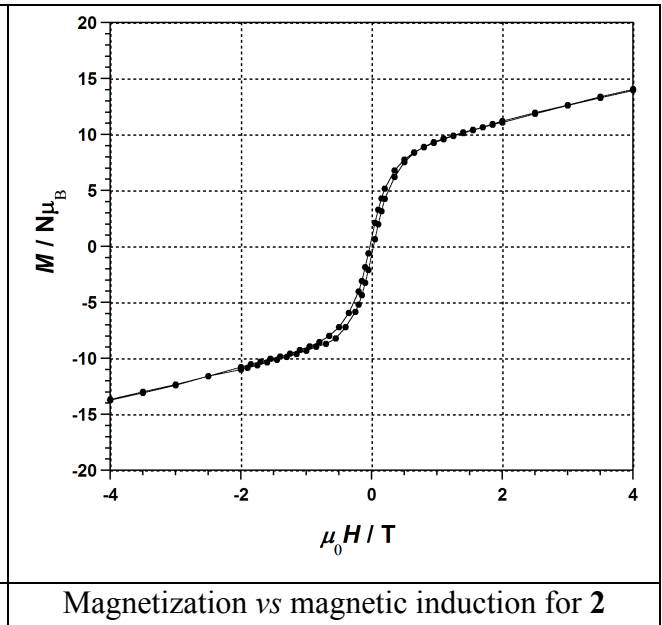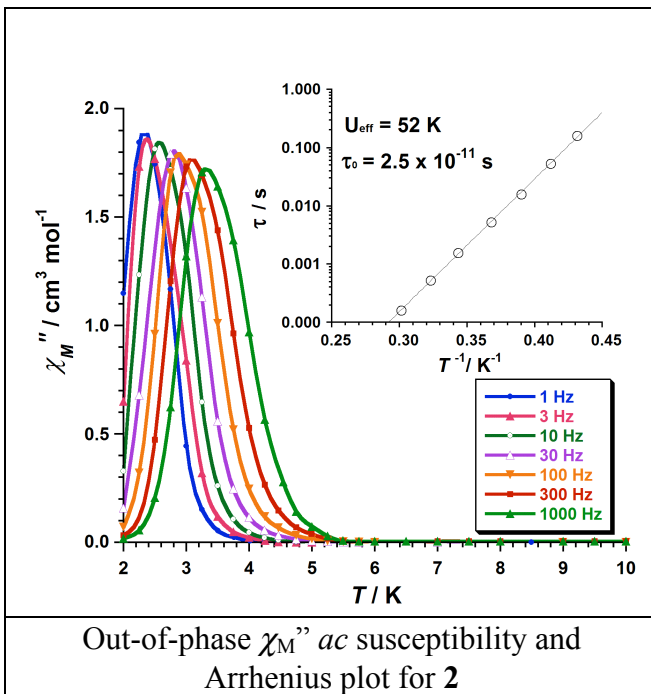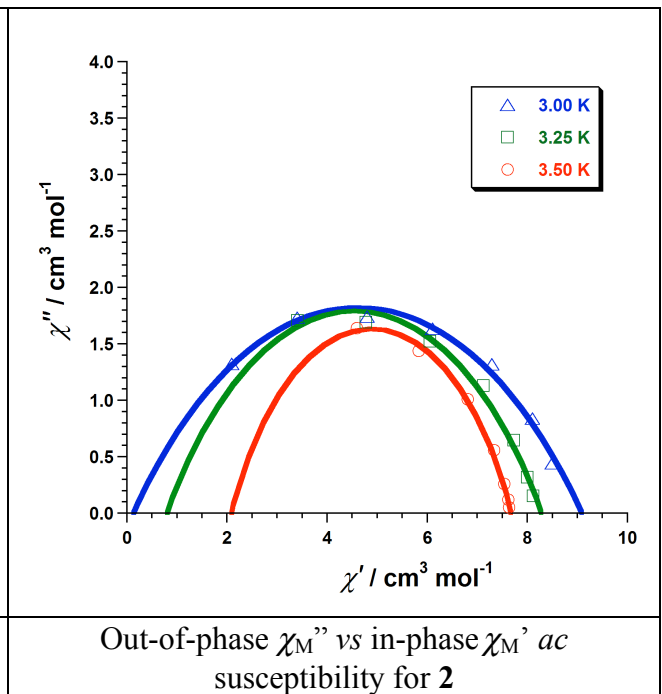

## Compound 3

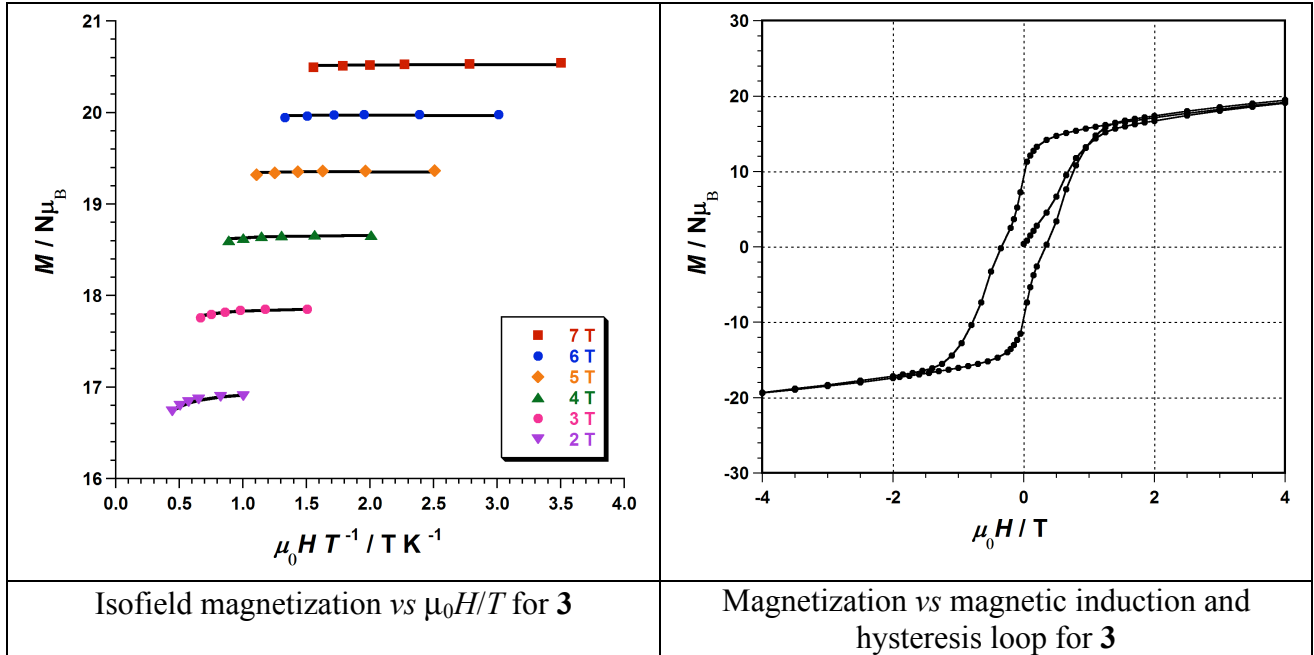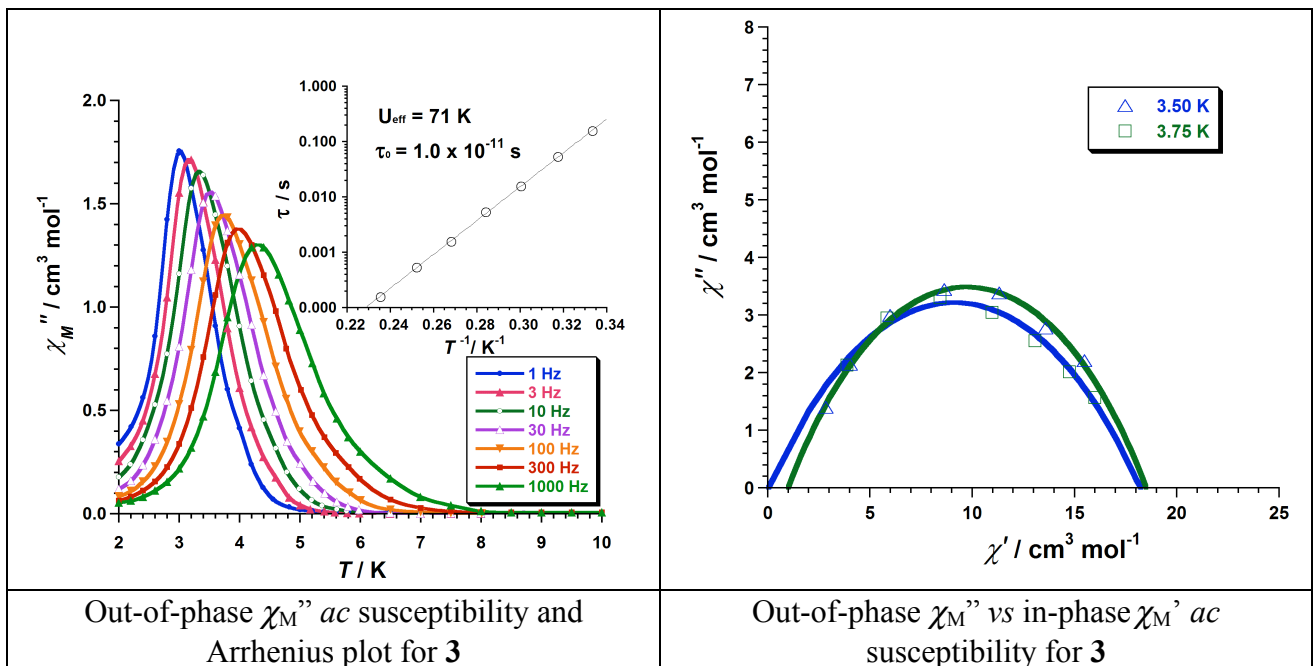

## Compound 4

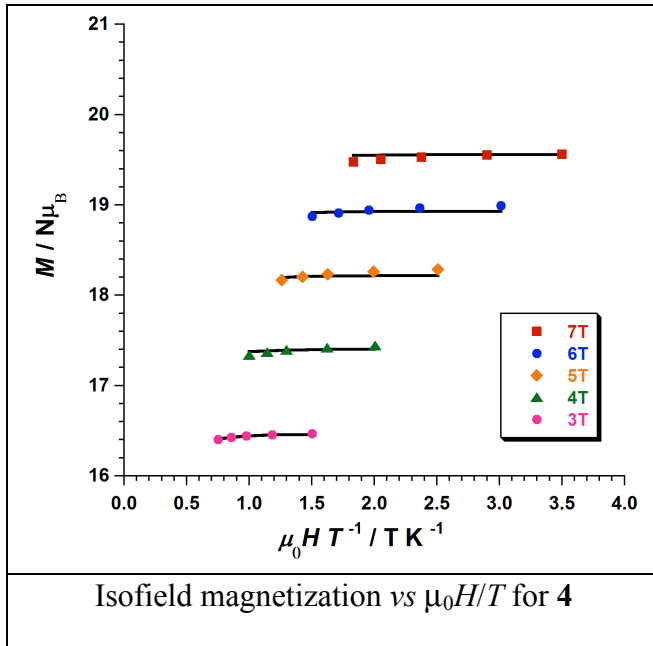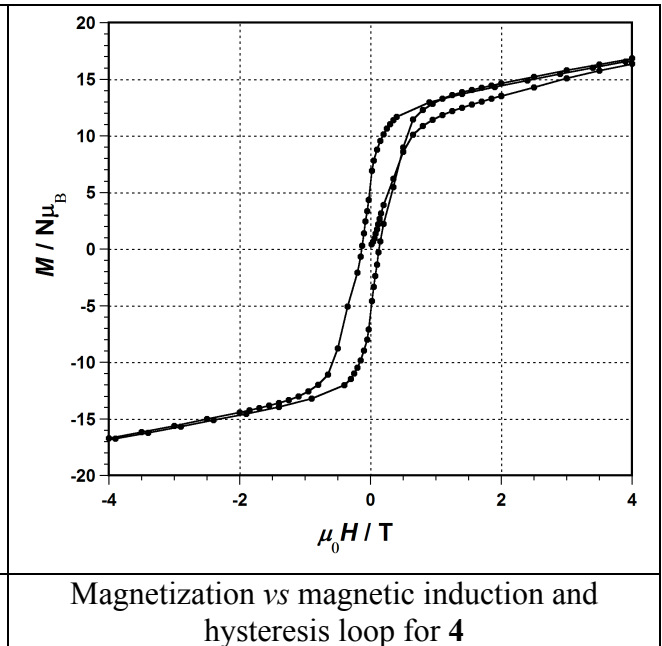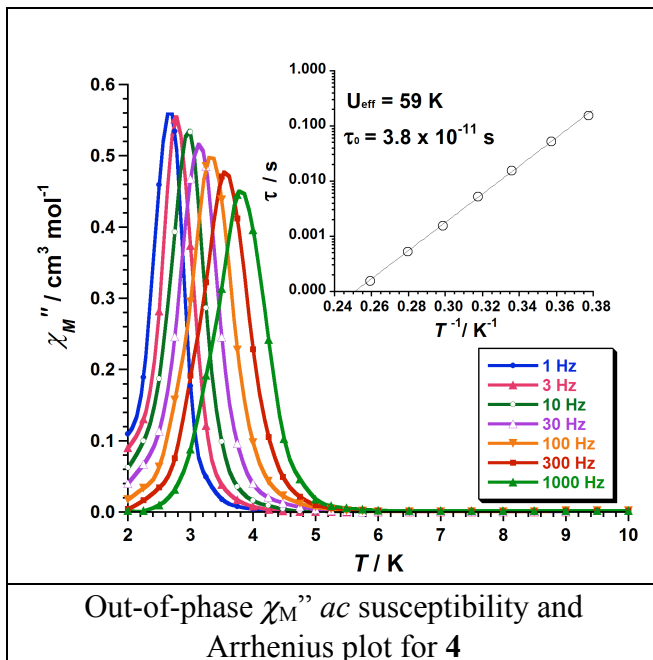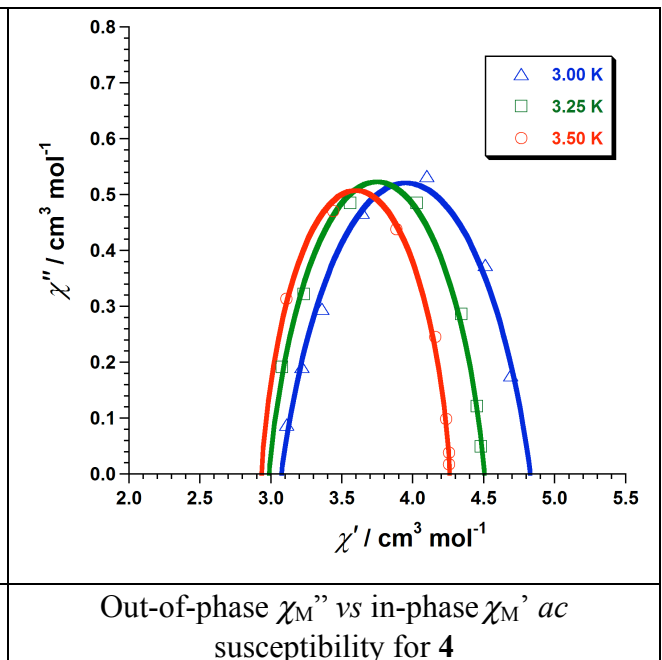

**4. Tables of bond lengths and angles**Table S1. Bond lengths / Å and angles / ° for compound **1**.

---

|              |            |
|--------------|------------|
| Mn(1)-O(2)   | 1.873(4)   |
| Mn(1)-O(1)   | 1.885(4)   |
| Mn(1)-O(7)   | 1.889(4)   |
| Mn(1)-N(1)   | 1.973(4)   |
| Mn(1)-O(8)   | 2.262(4)   |
| Mn(1)-O(4)#1 | 2.333(4)   |
| Mn(1)-Mn(2)  | 3.2343(11) |
| Mn(2)-O(1)   | 1.887(4)   |
| Mn(2)-O(4)   | 1.893(4)   |
| Mn(2)-O(3)   | 1.928(3)   |
| Mn(2)-N(3)   | 1.993(4)   |
| Mn(2)-O(9)   | 2.112(4)   |
| Mn(2)-O(3)#1 | 2.354(4)   |
| Mn(2)-Mn(3)  | 3.2220(12) |
| Mn(3)-O(1)   | 1.849(4)   |
| Mn(3)-O(6)   | 1.850(4)   |
| Mn(3)-O(5)   | 1.887(4)   |
| Mn(3)-N(5)   | 2.006(5)   |
| Mn(3)-O(11)  | 2.142(4)   |
| N(1)-C(7)    | 1.310(6)   |
| N(1)-O(3)    | 1.387(5)   |
| N(2)-C(7)    | 1.354(7)   |
| N(2)-C(8)    | 1.459(7)   |
| N(2)-C(9)    | 1.464(7)   |
| N(3)-C(16)   | 1.295(7)   |
| N(3)-O(5)    | 1.370(5)   |
| N(4)-C(16)   | 1.364(7)   |
| N(4)-C(17)   | 1.444(8)   |
| N(4)-C(18)   | 1.452(8)   |
| N(5)-C(25)   | 1.306(7)   |
| N(5)-O(7)    | 1.373(5)   |
| N(6)-C(25)   | 1.368(7)   |
| N(6)-C(27)   | 1.451(8)   |
| N(6)-C(26)   | 1.467(8)   |
| O(2)-C(1)    | 1.335(6)   |
| O(3)-Mn(2)#1 | 2.354(4)   |
| O(4)-C(10)   | 1.346(6)   |

|              |          |
|--------------|----------|
| O(4)-Mn(1)#1 | 2.333(4) |
| O(6)-C(19)   | 1.318(7) |
| O(8)-C(28)   | 1.438(9) |
| O(8)-H(8)    | 0.8774   |
| O(9)-C(30)   | 1.242(7) |
| O(10)-C(30)  | 1.260(7) |
| O(11)-C(37)  | 1.399(8) |
| O(11)-H(11A) | 0.9347   |
| C(1)-C(6)    | 1.396(8) |
| C(1)-C(2)    | 1.400(8) |
| C(2)-C(3)    | 1.372(8) |
| C(2)-H(2)    | 0.9500   |
| C(3)-C(4)    | 1.388(9) |
| C(3)-H(3)    | 0.9500   |
| C(4)-C(5)    | 1.374(8) |
| C(4)-H(4)    | 0.9500   |
| C(5)-C(6)    | 1.398(8) |
| C(5)-H(5)    | 0.9500   |
| C(6)-C(7)    | 1.472(7) |
| C(8)-H(8A)   | 0.9800   |
| C(8)-H(8B)   | 0.9800   |
| C(8)-H(8C)   | 0.9800   |
| C(9)-H(9A)   | 0.9800   |
| C(9)-H(9B)   | 0.9800   |
| C(9)-H(9C)   | 0.9800   |
| C(10)-C(15)  | 1.395(8) |
| C(10)-C(11)  | 1.399(8) |
| C(11)-C(12)  | 1.372(8) |
| C(11)-H(11)  | 0.9500   |
| C(12)-C(13)  | 1.391(9) |
| C(12)-H(12)  | 0.9500   |
| C(13)-C(14)  | 1.392(8) |
| C(13)-H(13)  | 0.9500   |
| C(14)-C(15)  | 1.394(8) |
| C(14)-H(14)  | 0.9500   |
| C(15)-C(16)  | 1.478(8) |
| C(17)-H(17A) | 0.9800   |
| C(17)-H(17B) | 0.9800   |
| C(17)-H(17C) | 0.9800   |
| C(18)-H(18A) | 0.9800   |



|              |           |
|--------------|-----------|
| C(18)-H(18B) | 0.9800    |
| C(18)-H(18C) | 0.9800    |
| C(19)-C(20)  | 1.398(8)  |
| C(19)-C(24)  | 1.406(8)  |
| C(20)-C(21)  | 1.375(9)  |
| C(20)-H(20)  | 0.9500    |
| C(21)-C(22)  | 1.376(9)  |
| C(21)-H(21)  | 0.9500    |
| C(22)-C(23)  | 1.360(9)  |
| C(22)-H(22)  | 0.9500    |
| C(23)-C(24)  | 1.407(8)  |
| C(23)-H(23)  | 0.9500    |
| C(24)-C(25)  | 1.463(8)  |
| C(26)-H(26A) | 0.9800    |
| C(26)-H(26B) | 0.9800    |
| C(26)-H(26C) | 0.9800    |
| C(27)-H(27A) | 0.9800    |
| C(27)-H(27B) | 0.9800    |
| C(27)-H(27C) | 0.9800    |
| C(28)-C(29)  | 1.424(11) |
| C(28)-H(28A) | 0.9900    |
| C(28)-H(28B) | 0.9900    |
| C(29)-H(29A) | 0.9800    |
| C(29)-H(29B) | 0.9800    |
| C(29)-H(29C) | 0.9800    |
| C(30)-C(31)  | 1.500(8)  |
| C(31)-C(36)  | 1.369(8)  |
| C(31)-C(32)  | 1.381(9)  |
| C(32)-C(33)  | 1.385(9)  |
| C(32)-H(32)  | 0.9500    |
| C(33)-C(34)  | 1.376(11) |
| C(33)-H(33)  | 0.9500    |
| C(34)-C(35)  | 1.353(12) |
| C(34)-H(34)  | 0.9500    |
| C(35)-C(36)  | 1.377(10) |
| C(35)-H(35)  | 0.9500    |
| C(36)-H(36)  | 0.9500    |
| C(37)-C(38)  | 1.472(11) |
| C(37)-H(37A) | 0.9900    |
| C(37)-H(37B) | 0.9900    |

|                    |            |
|--------------------|------------|
| C(38)-H(38A)       | 0.9800     |
| C(38)-H(38B)       | 0.9800     |
| C(38)-H(38C)       | 0.9800     |
| C(39)-Cl(3)        | 1.715(9)   |
| C(39)-Cl(1)        | 1.735(8)   |
| C(39)-Cl(2)        | 1.736(9)   |
| C(39)-H(39)        | 1.0000     |
| O(2)-Mn(1)-O(1)    | 176.92(16) |
| O(2)-Mn(1)-O(7)    | 91.93(16)  |
| O(1)-Mn(1)-O(7)    | 91.14(15)  |
| O(2)-Mn(1)-N(1)    | 88.63(17)  |
| O(1)-Mn(1)-N(1)    | 88.34(16)  |
| O(7)-Mn(1)-N(1)    | 175.11(18) |
| O(2)-Mn(1)-O(8)    | 91.61(16)  |
| O(1)-Mn(1)-O(8)    | 87.74(15)  |
| O(7)-Mn(1)-O(8)    | 96.55(17)  |
| N(1)-Mn(1)-O(8)    | 88.30(16)  |
| O(2)-Mn(1)-O(4)#1  | 89.00(15)  |
| O(1)-Mn(1)-O(4)#1  | 91.24(14)  |
| O(7)-Mn(1)-O(4)#1  | 91.23(15)  |
| N(1)-Mn(1)-O(4)#1  | 83.92(16)  |
| O(8)-Mn(1)-O(4)#1  | 172.18(14) |
| O(2)-Mn(1)-Mn(2)   | 146.17(12) |
| O(1)-Mn(1)-Mn(2)   | 30.99(11)  |
| O(7)-Mn(1)-Mn(2)   | 120.34(12) |
| N(1)-Mn(1)-Mn(2)   | 58.33(12)  |
| O(8)-Mn(1)-Mn(2)   | 94.21(11)  |
| O(4)#1-Mn(1)-Mn(2) | 81.04(9)   |
| O(1)-Mn(2)-O(4)    | 168.76(16) |
| O(1)-Mn(2)-O(3)    | 89.72(15)  |
| O(4)-Mn(2)-O(3)    | 90.64(15)  |
| O(1)-Mn(2)-N(3)    | 88.51(17)  |
| O(4)-Mn(2)-N(3)    | 89.23(17)  |
| O(3)-Mn(2)-N(3)    | 170.19(17) |
| O(1)-Mn(2)-O(9)    | 99.12(16)  |
| O(4)-Mn(2)-O(9)    | 92.05(15)  |
| O(3)-Mn(2)-O(9)    | 94.97(15)  |
| N(3)-Mn(2)-O(9)    | 94.84(17)  |
| O(1)-Mn(2)-O(3)#1  | 84.28(14)  |

|                    |            |
|--------------------|------------|
| O(4)-Mn(2)-O(3)#1  | 84.68(13)  |
| O(3)-Mn(2)-O(3)#1  | 80.79(14)  |
| N(3)-Mn(2)-O(3)#1  | 89.43(15)  |
| O(9)-Mn(2)-O(3)#1  | 174.59(13) |
| O(1)-Mn(2)-Mn(3)   | 30.07(11)  |
| O(4)-Mn(2)-Mn(3)   | 144.06(11) |
| O(3)-Mn(2)-Mn(3)   | 117.45(11) |
| N(3)-Mn(2)-Mn(3)   | 59.20(13)  |
| O(9)-Mn(2)-Mn(3)   | 106.27(11) |
| O(3)#1-Mn(2)-Mn(3) | 78.77(9)   |
| O(1)-Mn(2)-Mn(1)   | 30.95(11)  |
| O(4)-Mn(2)-Mn(1)   | 148.85(11) |
| O(3)-Mn(2)-Mn(1)   | 58.99(10)  |
| N(3)-Mn(2)-Mn(1)   | 119.41(13) |
| O(9)-Mn(2)-Mn(1)   | 97.02(11)  |
| O(3)#1-Mn(2)-Mn(1) | 83.72(8)   |
| Mn(3)-Mn(2)-Mn(1)  | 60.42(3)   |
| O(1)-Mn(3)-O(6)    | 166.24(19) |
| O(1)-Mn(3)-O(5)    | 91.97(16)  |
| O(6)-Mn(3)-O(5)    | 83.77(17)  |
| O(1)-Mn(3)-N(5)    | 90.11(16)  |
| O(6)-Mn(3)-N(5)    | 90.36(18)  |
| O(5)-Mn(3)-N(5)    | 163.41(18) |
| O(1)-Mn(3)-O(11)   | 92.00(16)  |
| O(6)-Mn(3)-O(11)   | 101.53(19) |
| O(5)-Mn(3)-O(11)   | 97.83(18)  |
| N(5)-Mn(3)-O(11)   | 98.54(18)  |
| O(1)-Mn(3)-Mn(2)   | 30.76(11)  |
| O(6)-Mn(3)-Mn(2)   | 142.97(13) |
| O(5)-Mn(3)-Mn(2)   | 61.21(11)  |
| N(5)-Mn(3)-Mn(2)   | 119.65(13) |
| O(11)-Mn(3)-Mn(2)  | 95.22(12)  |
| C(7)-N(1)-O(3)     | 117.0(4)   |
| C(7)-N(1)-Mn(1)    | 130.3(4)   |
| O(3)-N(1)-Mn(1)    | 110.7(3)   |
| C(7)-N(2)-C(8)     | 122.8(5)   |
| C(7)-N(2)-C(9)     | 122.6(4)   |
| C(8)-N(2)-C(9)     | 113.6(5)   |
| C(16)-N(3)-O(5)    | 115.9(4)   |
| C(16)-N(3)-Mn(2)   | 126.8(4)   |

|                    |            |
|--------------------|------------|
| O(5)-N(3)-Mn(2)    | 114.2(3)   |
| C(16)-N(4)-C(17)   | 121.6(5)   |
| C(16)-N(4)-C(18)   | 122.8(5)   |
| C(17)-N(4)-C(18)   | 115.3(5)   |
| C(25)-N(5)-O(7)    | 114.4(4)   |
| C(25)-N(5)-Mn(3)   | 127.1(4)   |
| O(7)-N(5)-Mn(3)    | 116.4(3)   |
| C(25)-N(6)-C(27)   | 123.6(5)   |
| C(25)-N(6)-C(26)   | 118.9(5)   |
| C(27)-N(6)-C(26)   | 115.3(5)   |
| Mn(3)-O(1)-Mn(1)   | 120.94(19) |
| Mn(3)-O(1)-Mn(2)   | 119.17(19) |
| Mn(1)-O(1)-Mn(2)   | 118.05(18) |
| C(1)-O(2)-Mn(1)    | 122.0(3)   |
| N(1)-O(3)-Mn(2)    | 112.1(3)   |
| N(1)-O(3)-Mn(2)#1  | 113.4(3)   |
| Mn(2)-O(3)-Mn(2)#1 | 99.21(14)  |
| C(10)-O(4)-Mn(2)   | 118.3(3)   |
| C(10)-O(4)-Mn(1)#1 | 115.5(3)   |
| Mn(2)-O(4)-Mn(1)#1 | 117.35(16) |
| N(3)-O(5)-Mn(3)    | 116.9(3)   |
| C(19)-O(6)-Mn(3)   | 128.7(4)   |
| N(5)-O(7)-Mn(1)    | 120.9(3)   |
| C(28)-O(8)-Mn(1)   | 127.3(5)   |
| C(28)-O(8)-H(8)    | 96.3       |
| Mn(1)-O(8)-H(8)    | 106.1      |
| C(30)-O(9)-Mn(2)   | 135.7(4)   |
| C(37)-O(11)-Mn(3)  | 130.0(4)   |
| C(37)-O(11)-H(11A) | 105.8      |
| Mn(3)-O(11)-H(11A) | 117.8      |
| O(2)-C(1)-C(6)     | 124.7(5)   |
| O(2)-C(1)-C(2)     | 116.4(5)   |
| C(6)-C(1)-C(2)     | 118.9(5)   |
| C(3)-C(2)-C(1)     | 121.2(6)   |
| C(3)-C(2)-H(2)     | 119.4      |
| C(1)-C(2)-H(2)     | 119.4      |
| C(2)-C(3)-C(4)     | 120.0(6)   |
| C(2)-C(3)-H(3)     | 120.0      |
| C(4)-C(3)-H(3)     | 120.0      |
| C(5)-C(4)-C(3)     | 119.4(6)   |

|                   |          |
|-------------------|----------|
| C(5)-C(4)-H(4)    | 120.3    |
| C(3)-C(4)-H(4)    | 120.3    |
| C(4)-C(5)-C(6)    | 121.5(6) |
| C(4)-C(5)-H(5)    | 119.3    |
| C(6)-C(5)-H(5)    | 119.3    |
| C(1)-C(6)-C(5)    | 118.9(5) |
| C(1)-C(6)-C(7)    | 122.7(5) |
| C(5)-C(6)-C(7)    | 118.4(5) |
| N(1)-C(7)-N(2)    | 123.3(5) |
| N(1)-C(7)-C(6)    | 116.9(5) |
| N(2)-C(7)-C(6)    | 119.8(5) |
| N(2)-C(8)-H(8A)   | 109.5    |
| N(2)-C(8)-H(8B)   | 109.5    |
| H(8A)-C(8)-H(8B)  | 109.5    |
| N(2)-C(8)-H(8C)   | 109.5    |
| H(8A)-C(8)-H(8C)  | 109.5    |
| H(8B)-C(8)-H(8C)  | 109.5    |
| N(2)-C(9)-H(9A)   | 109.5    |
| N(2)-C(9)-H(9B)   | 109.5    |
| H(9A)-C(9)-H(9B)  | 109.5    |
| N(2)-C(9)-H(9C)   | 109.5    |
| H(9A)-C(9)-H(9C)  | 109.5    |
| H(9B)-C(9)-H(9C)  | 109.5    |
| O(4)-C(10)-C(15)  | 122.2(5) |
| O(4)-C(10)-C(11)  | 118.2(5) |
| C(15)-C(10)-C(11) | 119.6(5) |
| C(12)-C(11)-C(10) | 120.3(6) |
| C(12)-C(11)-H(11) | 119.9    |
| C(10)-C(11)-H(11) | 119.9    |
| C(11)-C(12)-C(13) | 121.4(6) |
| C(11)-C(12)-H(12) | 119.3    |
| C(13)-C(12)-H(12) | 119.3    |
| C(12)-C(13)-C(14) | 118.1(6) |
| C(12)-C(13)-H(13) | 121.0    |
| C(14)-C(13)-H(13) | 121.0    |
| C(13)-C(14)-C(15) | 121.7(6) |
| C(13)-C(14)-H(14) | 119.1    |
| C(15)-C(14)-H(14) | 119.1    |
| C(14)-C(15)-C(10) | 118.9(5) |
| C(14)-C(15)-C(16) | 118.7(5) |

|                     |          |
|---------------------|----------|
| C(10)-C(15)-C(16)   | 122.4(5) |
| N(3)-C(16)-N(4)     | 123.5(5) |
| N(3)-C(16)-C(15)    | 118.0(5) |
| N(4)-C(16)-C(15)    | 118.5(5) |
| N(4)-C(17)-H(17A)   | 109.5    |
| N(4)-C(17)-H(17B)   | 109.5    |
| H(17A)-C(17)-H(17B) | 109.5    |
| N(4)-C(17)-H(17C)   | 109.5    |
| H(17A)-C(17)-H(17C) | 109.5    |
| H(17B)-C(17)-H(17C) | 109.5    |
| N(4)-C(18)-H(18A)   | 109.5    |
| N(4)-C(18)-H(18B)   | 109.5    |
| H(18A)-C(18)-H(18B) | 109.5    |
| N(4)-C(18)-H(18C)   | 109.5    |
| H(18A)-C(18)-H(18C) | 109.5    |
| H(18B)-C(18)-H(18C) | 109.5    |
| O(6)-C(19)-C(20)    | 117.4(5) |
| O(6)-C(19)-C(24)    | 123.1(5) |
| C(20)-C(19)-C(24)   | 119.5(5) |
| C(21)-C(20)-C(19)   | 120.8(6) |
| C(21)-C(20)-H(20)   | 119.6    |
| C(19)-C(20)-H(20)   | 119.6    |
| C(20)-C(21)-C(22)   | 120.1(6) |
| C(20)-C(21)-H(21)   | 120.0    |
| C(22)-C(21)-H(21)   | 120.0    |
| C(23)-C(22)-C(21)   | 120.0(6) |
| C(23)-C(22)-H(22)   | 120.0    |
| C(21)-C(22)-H(22)   | 120.0    |
| C(22)-C(23)-C(24)   | 122.1(6) |
| C(22)-C(23)-H(23)   | 118.9    |
| C(24)-C(23)-H(23)   | 118.9    |
| C(19)-C(24)-C(23)   | 117.4(5) |
| C(19)-C(24)-C(25)   | 122.8(5) |
| C(23)-C(24)-C(25)   | 119.8(5) |
| N(5)-C(25)-N(6)     | 123.6(5) |
| N(5)-C(25)-C(24)    | 120.6(5) |
| N(6)-C(25)-C(24)    | 115.8(5) |
| N(6)-C(26)-H(26A)   | 109.5    |
| N(6)-C(26)-H(26B)   | 109.5    |
| H(26A)-C(26)-H(26B) | 109.5    |

|                     |          |
|---------------------|----------|
| N(6)-C(26)-H(26C)   | 109.5    |
| H(26A)-C(26)-H(26C) | 109.5    |
| H(26B)-C(26)-H(26C) | 109.5    |
| N(6)-C(27)-H(27A)   | 109.5    |
| N(6)-C(27)-H(27B)   | 109.5    |
| H(27A)-C(27)-H(27B) | 109.5    |
| N(6)-C(27)-H(27C)   | 109.5    |
| H(27A)-C(27)-H(27C) | 109.5    |
| H(27B)-C(27)-H(27C) | 109.5    |
| C(29)-C(28)-O(8)    | 110.8(8) |
| C(29)-C(28)-H(28A)  | 109.5    |
| O(8)-C(28)-H(28A)   | 109.5    |
| C(29)-C(28)-H(28B)  | 109.5    |
| O(8)-C(28)-H(28B)   | 109.5    |
| H(28A)-C(28)-H(28B) | 108.1    |
| C(28)-C(29)-H(29A)  | 109.5    |
| C(28)-C(29)-H(29B)  | 109.5    |
| H(29A)-C(29)-H(29B) | 109.5    |
| C(28)-C(29)-H(29C)  | 109.5    |
| H(29A)-C(29)-H(29C) | 109.5    |
| H(29B)-C(29)-H(29C) | 109.5    |
| O(9)-C(30)-O(10)    | 125.3(5) |
| O(9)-C(30)-C(31)    | 118.3(5) |
| O(10)-C(30)-C(31)   | 116.4(5) |
| C(36)-C(31)-C(32)   | 118.9(6) |
| C(36)-C(31)-C(30)   | 121.9(6) |
| C(32)-C(31)-C(30)   | 119.2(5) |
| C(31)-C(32)-C(33)   | 120.3(7) |
| C(31)-C(32)-H(32)   | 119.8    |
| C(33)-C(32)-H(32)   | 119.8    |
| C(34)-C(33)-C(32)   | 119.2(8) |
| C(34)-C(33)-H(33)   | 120.4    |
| C(32)-C(33)-H(33)   | 120.4    |
| C(35)-C(34)-C(33)   | 120.7(7) |
| C(35)-C(34)-H(34)   | 119.6    |
| C(33)-C(34)-H(34)   | 119.6    |
| C(34)-C(35)-C(36)   | 119.8(8) |
| C(34)-C(35)-H(35)   | 120.1    |
| C(36)-C(35)-H(35)   | 120.1    |
| C(31)-C(36)-C(35)   | 120.9(7) |

|                     |          |
|---------------------|----------|
| C(31)-C(36)-H(36)   | 119.6    |
| C(35)-C(36)-H(36)   | 119.6    |
| O(11)-C(37)-C(38)   | 113.7(7) |
| O(11)-C(37)-H(37A)  | 108.8    |
| C(38)-C(37)-H(37A)  | 108.8    |
| O(11)-C(37)-H(37B)  | 108.8    |
| C(38)-C(37)-H(37B)  | 108.8    |
| H(37A)-C(37)-H(37B) | 107.7    |
| C(37)-C(38)-H(38A)  | 109.5    |
| C(37)-C(38)-H(38B)  | 109.5    |
| H(38A)-C(38)-H(38B) | 109.5    |
| C(37)-C(38)-H(38C)  | 109.5    |
| H(38A)-C(38)-H(38C) | 109.5    |
| H(38B)-C(38)-H(38C) | 109.5    |
| Cl(3)-C(39)-Cl(1)   | 109.7(4) |
| Cl(3)-C(39)-Cl(2)   | 111.2(5) |
| Cl(1)-C(39)-Cl(2)   | 111.5(5) |
| Cl(3)-C(39)-H(39)   | 108.1    |
| Cl(1)-C(39)-H(39)   | 108.1    |
| Cl(2)-C(39)-H(39)   | 108.1    |

---

Symmetry transformations used to generate equivalent atoms:

#1 -x+1,-y+1,-z+2



Table S2. Bond lengths / Å and angles / ° for compound **3**.

---

|              |            |
|--------------|------------|
| Mn(1)-O(2)   | 1.8721(18) |
| Mn(1)-O(1)   | 1.8911(16) |
| Mn(1)-O(7)   | 1.8926(17) |
| Mn(1)-N(1)   | 1.9746(19) |
| Mn(1)-O(8)   | 2.2470(19) |
| Mn(1)-O(4)#1 | 2.3418(17) |
| Mn(1)-Mn(2)  | 3.2329(7)  |
| Mn(2)-O(1)   | 1.8787(16) |
| Mn(2)-O(4)   | 1.8985(16) |
| Mn(2)-O(3)   | 1.9312(16) |
| Mn(2)-N(3)   | 1.980(2)   |
| Mn(2)-O(9)   | 2.1516(17) |
| Mn(2)-O(3)#1 | 2.3941(16) |
| Mn(3)-O(6)   | 1.8597(19) |
| Mn(3)-O(1)   | 1.8595(16) |
| Mn(3)-O(5)   | 1.8892(19) |
| Mn(3)-N(5)   | 2.012(2)   |
| Mn(3)-O(11)  | 2.1653(19) |
| O(2)-C(1)    | 1.326(3)   |
| O(3)-N(1)    | 1.387(2)   |
| O(3)-Mn(2)#1 | 2.3941(16) |
| O(4)-C(13)   | 1.354(3)   |
| O(4)-Mn(1)#1 | 2.3418(17) |
| O(5)-N(3)    | 1.372(3)   |
| O(6)-C(24)   | 1.330(3)   |
| O(7)-N(5)    | 1.374(3)   |
| O(8)-C(35)   | 1.411(4)   |
| O(8)-H(8)    | 0.8516     |
| O(9)-C(37)   | 1.255(3)   |
| O(10)-C(37)  | 1.250(3)   |
| O(11)-C(44B) | 1.38(2)    |
| O(11)-C(44A) | 1.454(17)  |
| O(11)-H(11)  | 0.8732     |
| N(1)-C(7)    | 1.308(3)   |
| N(2)-C(7)    | 1.360(3)   |
| N(2)-C(10)   | 1.455(4)   |
| N(2)-C(8)    | 1.487(4)   |
| N(3)-C(19)   | 1.293(4)   |

|              |           |
|--------------|-----------|
| N(4A)-C(19)  | 1.442(5)  |
| N(4A)-C(22A) | 1.456(8)  |
| N(4A)-C(20A) | 1.504(10) |
| N(4B)-C(19)  | 1.399(7)  |
| N(4B)-C(22B) | 1.468(17) |
| N(4B)-C(20B) | 1.493(11) |
| N(5)-C(30)   | 1.308(3)  |
| N(6)-C(30)   | 1.363(4)  |
| N(6)-C(31)   | 1.461(4)  |
| N(6)-C(33)   | 1.471(5)  |
| C(1)-C(2)    | 1.394(4)  |
| C(1)-C(6)    | 1.408(4)  |
| C(2)-C(3)    | 1.356(4)  |
| C(2)-H(2)    | 0.9500    |
| C(3)-C(4)    | 1.389(4)  |
| C(3)-H(3)    | 0.9500    |
| C(4)-C(5)    | 1.368(4)  |
| C(4)-H(4)    | 0.9500    |
| C(5)-C(6)    | 1.395(4)  |
| C(5)-H(5)    | 0.9500    |
| C(6)-C(7)    | 1.477(3)  |
| C(8)-C(9)    | 1.510(4)  |
| C(8)-H(8A)   | 0.9900    |
| C(8)-H(8B)   | 0.9900    |
| C(9)-H(9A)   | 0.9800    |
| C(9)-H(9B)   | 0.9800    |
| C(9)-H(9C)   | 0.9800    |
| C(10)-C(11)  | 1.478(4)  |
| C(10)-H(10A) | 0.9900    |
| C(10)-H(10B) | 0.9900    |
| C(11)-H(11A) | 0.9800    |
| C(11)-H(11B) | 0.9800    |
| C(11)-H(11C) | 0.9800    |
| C(13)-C(14)  | 1.390(4)  |
| C(13)-C(18)  | 1.393(4)  |
| C(14)-C(15)  | 1.379(4)  |
| C(14)-H(14)  | 0.9500    |
| C(15)-C(16)  | 1.363(5)  |
| C(15)-H(15)  | 0.9500    |
| C(16)-C(17)  | 1.377(5)  |

|               |           |
|---------------|-----------|
| C(16)-H(16)   | 0.9500    |
| C(17)-C(18)   | 1.406(4)  |
| C(17)-H(17)   | 0.9500    |
| C(18)-C(19)   | 1.465(4)  |
| C(20A)-C(21A) | 1.528(11) |
| C(20A)-H(20A) | 0.9900    |
| C(20A)-H(20B) | 0.9900    |
| C(21A)-H(21A) | 0.9800    |
| C(21A)-H(21B) | 0.9800    |
| C(21A)-H(21C) | 0.9800    |
| C(22A)-C(23A) | 1.466(12) |
| C(22A)-H(22A) | 0.9900    |
| C(22A)-H(22B) | 0.9900    |
| C(23A)-H(23A) | 0.9800    |
| C(23A)-H(23B) | 0.9800    |
| C(23A)-H(23C) | 0.9800    |
| C(20B)-C(21B) | 1.522(16) |
| C(20B)-H(20C) | 0.9900    |
| C(20B)-H(20D) | 0.9900    |
| C(21B)-H(21D) | 0.9800    |
| C(21B)-H(21E) | 0.9800    |
| C(21B)-H(21F) | 0.9800    |
| C(22B)-C(23B) | 1.541(18) |
| C(22B)-H(22C) | 0.9900    |
| C(22B)-H(22D) | 0.9900    |
| C(23B)-H(23D) | 0.9800    |
| C(23B)-H(23E) | 0.9800    |
| C(23B)-H(23F) | 0.9800    |
| C(24)-C(29)   | 1.399(4)  |
| C(24)-C(25)   | 1.411(4)  |
| C(25)-C(26)   | 1.367(5)  |
| C(25)-H(25)   | 0.9500    |
| C(26)-C(27)   | 1.377(6)  |
| C(26)-H(26)   | 0.9500    |
| C(27)-C(28)   | 1.370(5)  |
| C(27)-H(27)   | 0.9500    |
| C(28)-C(29)   | 1.401(4)  |
| C(28)-H(28)   | 0.9500    |
| C(29)-C(30)   | 1.468(4)  |
| C(31)-C(32)   | 1.501(6)  |

|               |           |
|---------------|-----------|
| C(31)-H(31A)  | 0.9900    |
| C(31)-H(31B)  | 0.9900    |
| C(32)-H(32A)  | 0.9800    |
| C(32)-H(32B)  | 0.9800    |
| C(32)-H(32C)  | 0.9800    |
| C(33)-C(34)   | 1.406(6)  |
| C(33)-H(33A)  | 0.9900    |
| C(33)-H(33B)  | 0.9900    |
| C(34)-H(34A)  | 0.9800    |
| C(34)-H(34B)  | 0.9800    |
| C(34)-H(34C)  | 0.9800    |
| C(35)-C(36)   | 1.444(6)  |
| C(35)-H(35A)  | 0.9900    |
| C(35)-H(35B)  | 0.9900    |
| C(36)-H(36A)  | 0.9800    |
| C(36)-H(36B)  | 0.9800    |
| C(36)-H(36C)  | 0.9800    |
| C(37)-C(38)   | 1.497(4)  |
| C(38)-C(39)   | 1.367(5)  |
| C(38)-C(43)   | 1.384(5)  |
| C(39)-C(40)   | 1.392(5)  |
| C(39)-H(39)   | 0.9500    |
| C(40)-C(41)   | 1.380(8)  |
| C(40)-H(40)   | 0.9500    |
| C(41)-C(42)   | 1.363(7)  |
| C(41)-H(41)   | 0.9500    |
| C(42)-C(43)   | 1.395(5)  |
| C(42)-H(42)   | 0.9500    |
| C(43)-H(43)   | 0.9500    |
| C(44A)-C(45A) | 1.515(15) |
| C(44A)-H(44A) | 0.9900    |
| C(44A)-H(44B) | 0.9900    |
| C(45A)-H(45A) | 0.9800    |
| C(45A)-H(45B) | 0.9800    |
| C(45A)-H(45C) | 0.9800    |
| C(44B)-C(45B) | 1.433(14) |
| C(44B)-H(44C) | 0.9900    |
| C(44B)-H(44D) | 0.9900    |
| C(45B)-H(45D) | 0.9800    |
| C(45B)-H(45E) | 0.9800    |

|                    |           |
|--------------------|-----------|
| C(45B)-H(45F)      | 0.9800    |
| O(2)-Mn(1)-O(1)    | 175.94(7) |
| O(2)-Mn(1)-O(7)    | 92.70(8)  |
| O(1)-Mn(1)-O(7)    | 90.88(7)  |
| O(2)-Mn(1)-N(1)    | 88.73(8)  |
| O(1)-Mn(1)-N(1)    | 87.86(7)  |
| O(7)-Mn(1)-N(1)    | 174.86(9) |
| O(2)-Mn(1)-O(8)    | 91.55(8)  |
| O(1)-Mn(1)-O(8)    | 86.19(7)  |
| O(7)-Mn(1)-O(8)    | 95.97(8)  |
| N(1)-Mn(1)-O(8)    | 88.92(8)  |
| O(2)-Mn(1)-O(4)#1  | 89.82(7)  |
| O(1)-Mn(1)-O(4)#1  | 91.88(6)  |
| O(7)-Mn(1)-O(4)#1  | 93.10(8)  |
| N(1)-Mn(1)-O(4)#1  | 81.97(7)  |
| O(8)-Mn(1)-O(4)#1  | 170.76(7) |
| O(2)-Mn(1)-Mn(2)   | 146.29(6) |
| O(1)-Mn(1)-Mn(2)   | 30.84(5)  |
| O(7)-Mn(1)-Mn(2)   | 119.79(6) |
| N(1)-Mn(1)-Mn(2)   | 58.11(6)  |
| O(8)-Mn(1)-Mn(2)   | 93.56(5)  |
| O(4)#1-Mn(1)-Mn(2) | 80.33(4)  |
| O(1)-Mn(2)-O(4)    | 167.82(7) |
| O(1)-Mn(2)-O(3)    | 90.80(7)  |
| O(4)-Mn(2)-O(3)    | 91.21(7)  |
| O(1)-Mn(2)-N(3)    | 87.54(8)  |
| O(4)-Mn(2)-N(3)    | 89.30(8)  |
| O(3)-Mn(2)-N(3)    | 174.36(8) |
| O(1)-Mn(2)-O(9)    | 97.50(7)  |
| O(4)-Mn(2)-O(9)    | 94.41(7)  |
| O(3)-Mn(2)-O(9)    | 92.61(7)  |
| N(3)-Mn(2)-O(9)    | 92.95(8)  |
| O(1)-Mn(2)-O(3)#1  | 85.55(6)  |
| O(4)-Mn(2)-O(3)#1  | 82.85(6)  |
| O(3)-Mn(2)-O(3)#1  | 81.91(6)  |
| N(3)-Mn(2)-O(3)#1  | 92.59(7)  |
| O(9)-Mn(2)-O(3)#1  | 173.79(7) |
| O(1)-Mn(2)-Mn(1)   | 31.07(5)  |
| O(4)-Mn(2)-Mn(1)   | 149.82(5) |

|                     |            |
|---------------------|------------|
| O(3)-Mn(2)-Mn(1)    | 59.86(5)   |
| N(3)-Mn(2)-Mn(1)    | 118.60(6)  |
| O(9)-Mn(2)-Mn(1)    | 95.28(5)   |
| O(3)#1-Mn(2)-Mn(1)  | 84.52(4)   |
| O(6)-Mn(3)-O(1)     | 166.57(8)  |
| O(6)-Mn(3)-O(5)     | 88.11(8)   |
| O(1)-Mn(3)-O(5)     | 90.66(7)   |
| O(6)-Mn(3)-N(5)     | 89.77(9)   |
| O(1)-Mn(3)-N(5)     | 88.61(8)   |
| O(5)-Mn(3)-N(5)     | 167.77(9)  |
| O(6)-Mn(3)-O(11)    | 98.07(9)   |
| O(1)-Mn(3)-O(11)    | 95.36(8)   |
| O(5)-Mn(3)-O(11)    | 95.92(8)   |
| N(5)-Mn(3)-O(11)    | 96.31(9)   |
| Mn(3)-O(1)-Mn(2)    | 120.40(9)  |
| Mn(3)-O(1)-Mn(1)    | 120.62(8)  |
| Mn(2)-O(1)-Mn(1)    | 118.09(8)  |
| C(1)-O(2)-Mn(1)     | 120.71(15) |
| N(1)-O(3)-Mn(2)     | 111.36(12) |
| N(1)-O(3)-Mn(2)#1   | 112.84(11) |
| Mn(2)-O(3)-Mn(2)#1  | 98.09(6)   |
| C(13)-O(4)-Mn(2)    | 116.86(16) |
| C(13)-O(4)-Mn(1)#1  | 118.65(15) |
| Mn(2)-O(4)-Mn(1)#1  | 119.51(7)  |
| N(3)-O(5)-Mn(3)     | 115.93(14) |
| C(24)-O(6)-Mn(3)    | 121.97(18) |
| N(5)-O(7)-Mn(1)     | 117.25(14) |
| C(35)-O(8)-Mn(1)    | 131.9(2)   |
| C(35)-O(8)-H(8)     | 100.7      |
| Mn(1)-O(8)-H(8)     | 125.5      |
| C(37)-O(9)-Mn(2)    | 135.57(17) |
| C(44B)-O(11)-C(44A) | 21.7(12)   |
| C(44B)-O(11)-Mn(3)  | 131.2(7)   |
| C(44A)-O(11)-Mn(3)  | 141.0(6)   |
| C(44B)-O(11)-H(11)  | 114.3      |
| C(44A)-O(11)-H(11)  | 106.0      |
| Mn(3)-O(11)-H(11)   | 112.4      |
| C(7)-N(1)-O(3)      | 117.70(19) |
| C(7)-N(1)-Mn(1)     | 128.94(16) |
| O(3)-N(1)-Mn(1)     | 112.40(13) |

|                     |            |
|---------------------|------------|
| C(7)-N(2)-C(10)     | 121.1(2)   |
| C(7)-N(2)-C(8)      | 120.2(2)   |
| C(10)-N(2)-C(8)     | 118.3(2)   |
| C(19)-N(3)-O(5)     | 117.5(2)   |
| C(19)-N(3)-Mn(2)    | 125.5(2)   |
| O(5)-N(3)-Mn(2)     | 115.09(14) |
| C(19)-N(4A)-C(22A)  | 120.2(5)   |
| C(19)-N(4A)-C(20A)  | 123.1(5)   |
| C(22A)-N(4A)-C(20A) | 115.7(6)   |
| C(19)-N(4B)-C(22B)  | 140.7(12)  |
| C(19)-N(4B)-C(20B)  | 110.1(7)   |
| C(22B)-N(4B)-C(20B) | 107.4(12)  |
| C(30)-N(5)-O(7)     | 115.6(2)   |
| C(30)-N(5)-Mn(3)    | 126.3(2)   |
| O(7)-N(5)-Mn(3)     | 116.17(14) |
| C(30)-N(6)-C(31)    | 118.2(3)   |
| C(30)-N(6)-C(33)    | 121.4(3)   |
| C(31)-N(6)-C(33)    | 120.3(3)   |
| O(2)-C(1)-C(2)      | 118.1(2)   |
| O(2)-C(1)-C(6)      | 123.7(2)   |
| C(2)-C(1)-C(6)      | 118.1(2)   |
| C(3)-C(2)-C(1)      | 122.1(3)   |
| C(3)-C(2)-H(2)      | 119.0      |
| C(1)-C(2)-H(2)      | 119.0      |
| C(2)-C(3)-C(4)      | 120.1(3)   |
| C(2)-C(3)-H(3)      | 119.9      |
| C(4)-C(3)-H(3)      | 119.9      |
| C(5)-C(4)-C(3)      | 119.1(3)   |
| C(5)-C(4)-H(4)      | 120.5      |
| C(3)-C(4)-H(4)      | 120.5      |
| C(4)-C(5)-C(6)      | 121.9(3)   |
| C(4)-C(5)-H(5)      | 119.0      |
| C(6)-C(5)-H(5)      | 119.0      |
| C(5)-C(6)-C(1)      | 118.6(2)   |
| C(5)-C(6)-C(7)      | 118.7(2)   |
| C(1)-C(6)-C(7)      | 122.7(2)   |
| N(1)-C(7)-N(2)      | 123.4(2)   |
| N(1)-C(7)-C(6)      | 117.0(2)   |
| N(2)-C(7)-C(6)      | 119.6(2)   |
| N(2)-C(8)-C(9)      | 115.3(3)   |

|                     |          |
|---------------------|----------|
| N(2)-C(8)-H(8A)     | 108.4    |
| C(9)-C(8)-H(8A)     | 108.4    |
| N(2)-C(8)-H(8B)     | 108.4    |
| C(9)-C(8)-H(8B)     | 108.4    |
| H(8A)-C(8)-H(8B)    | 107.5    |
| C(8)-C(9)-H(9A)     | 109.5    |
| C(8)-C(9)-H(9B)     | 109.5    |
| H(9A)-C(9)-H(9B)    | 109.5    |
| C(8)-C(9)-H(9C)     | 109.5    |
| H(9A)-C(9)-H(9C)    | 109.5    |
| H(9B)-C(9)-H(9C)    | 109.5    |
| N(2)-C(10)-C(11)    | 115.1(3) |
| N(2)-C(10)-H(10A)   | 108.5    |
| C(11)-C(10)-H(10A)  | 108.5    |
| N(2)-C(10)-H(10B)   | 108.5    |
| C(11)-C(10)-H(10B)  | 108.5    |
| H(10A)-C(10)-H(10B) | 107.5    |
| C(10)-C(11)-H(11A)  | 109.5    |
| C(10)-C(11)-H(11B)  | 109.5    |
| H(11A)-C(11)-H(11B) | 109.5    |
| C(10)-C(11)-H(11C)  | 109.5    |
| H(11A)-C(11)-H(11C) | 109.5    |
| H(11B)-C(11)-H(11C) | 109.5    |
| O(4)-C(13)-C(14)    | 118.5(3) |
| O(4)-C(13)-C(18)    | 121.3(2) |
| C(14)-C(13)-C(18)   | 120.2(2) |
| C(15)-C(14)-C(13)   | 120.2(3) |
| C(15)-C(14)-H(14)   | 119.9    |
| C(13)-C(14)-H(14)   | 119.9    |
| C(16)-C(15)-C(14)   | 120.5(3) |
| C(16)-C(15)-H(15)   | 119.8    |
| C(14)-C(15)-H(15)   | 119.8    |
| C(15)-C(16)-C(17)   | 120.0(3) |
| C(15)-C(16)-H(16)   | 120.0    |
| C(17)-C(16)-H(16)   | 120.0    |
| C(16)-C(17)-C(18)   | 121.1(4) |
| C(16)-C(17)-H(17)   | 119.4    |
| C(18)-C(17)-H(17)   | 119.4    |
| C(13)-C(18)-C(17)   | 117.8(3) |
| C(13)-C(18)-C(19)   | 123.0(2) |



|                      |           |
|----------------------|-----------|
| C(17)-C(18)-C(19)    | 119.2(3)  |
| N(3)-C(19)-N(4B)     | 120.2(4)  |
| N(3)-C(19)-N(4A)     | 122.6(3)  |
| N(4B)-C(19)-N(4A)    | 37.0(3)   |
| N(3)-C(19)-C(18)     | 118.1(3)  |
| N(4B)-C(19)-C(18)    | 114.3(4)  |
| N(4A)-C(19)-C(18)    | 118.2(3)  |
| N(4A)-C(20A)-C(21A)  | 112.2(8)  |
| N(4A)-C(20A)-H(20A)  | 109.2     |
| C(21A)-C(20A)-H(20A) | 109.2     |
| N(4A)-C(20A)-H(20B)  | 109.2     |
| C(21A)-C(20A)-H(20B) | 109.2     |
| H(20A)-C(20A)-H(20B) | 107.9     |
| C(20A)-C(21A)-H(21A) | 109.5     |
| C(20A)-C(21A)-H(21B) | 109.5     |
| H(21A)-C(21A)-H(21B) | 109.5     |
| C(20A)-C(21A)-H(21C) | 109.5     |
| H(21A)-C(21A)-H(21C) | 109.5     |
| H(21B)-C(21A)-H(21C) | 109.5     |
| N(4A)-C(22A)-C(23A)  | 106.5(7)  |
| N(4A)-C(22A)-H(22A)  | 110.4     |
| C(23A)-C(22A)-H(22A) | 110.4     |
| N(4A)-C(22A)-H(22B)  | 110.4     |
| C(23A)-C(22A)-H(22B) | 110.4     |
| H(22A)-C(22A)-H(22B) | 108.6     |
| C(22A)-C(23A)-H(23A) | 109.5     |
| C(22A)-C(23A)-H(23B) | 109.5     |
| H(23A)-C(23A)-H(23B) | 109.5     |
| C(22A)-C(23A)-H(23C) | 109.5     |
| H(23A)-C(23A)-H(23C) | 109.5     |
| H(23B)-C(23A)-H(23C) | 109.5     |
| N(4B)-C(20B)-C(21B)  | 118.0(10) |
| N(4B)-C(20B)-H(20C)  | 107.8     |
| C(21B)-C(20B)-H(20C) | 107.8     |
| N(4B)-C(20B)-H(20D)  | 107.8     |
| C(21B)-C(20B)-H(20D) | 107.8     |
| H(20C)-C(20B)-H(20D) | 107.2     |
| C(20B)-C(21B)-H(21D) | 109.5     |
| C(20B)-C(21B)-H(21E) | 109.5     |
| H(21D)-C(21B)-H(21E) | 109.5     |

|                      |           |
|----------------------|-----------|
| C(20B)-C(21B)-H(21F) | 109.5     |
| H(21D)-C(21B)-H(21F) | 109.5     |
| H(21E)-C(21B)-H(21F) | 109.5     |
| N(4B)-C(22B)-C(23B)  | 114.3(16) |
| N(4B)-C(22B)-H(22C)  | 108.7     |
| C(23B)-C(22B)-H(22C) | 108.7     |
| N(4B)-C(22B)-H(22D)  | 108.7     |
| C(23B)-C(22B)-H(22D) | 108.7     |
| H(22C)-C(22B)-H(22D) | 107.6     |
| C(22B)-C(23B)-H(23D) | 109.5     |
| C(22B)-C(23B)-H(23E) | 109.5     |
| H(23D)-C(23B)-H(23E) | 109.5     |
| C(22B)-C(23B)-H(23F) | 109.5     |
| H(23D)-C(23B)-H(23F) | 109.5     |
| H(23E)-C(23B)-H(23F) | 109.5     |
| O(6)-C(24)-C(29)     | 122.7(3)  |
| O(6)-C(24)-C(25)     | 118.0(3)  |
| C(29)-C(24)-C(25)    | 119.2(3)  |
| C(26)-C(25)-C(24)    | 120.3(4)  |
| C(26)-C(25)-H(25)    | 119.8     |
| C(24)-C(25)-H(25)    | 119.8     |
| C(25)-C(26)-C(27)    | 120.6(4)  |
| C(25)-C(26)-H(26)    | 119.7     |
| C(27)-C(26)-H(26)    | 119.7     |
| C(28)-C(27)-C(26)    | 119.7(3)  |
| C(28)-C(27)-H(27)    | 120.1     |
| C(26)-C(27)-H(27)    | 120.1     |
| C(27)-C(28)-C(29)    | 121.5(4)  |
| C(27)-C(28)-H(28)    | 119.2     |
| C(29)-C(28)-H(28)    | 119.2     |
| C(24)-C(29)-C(28)    | 118.3(3)  |
| C(24)-C(29)-C(30)    | 122.9(3)  |
| C(28)-C(29)-C(30)    | 118.8(3)  |
| N(5)-C(30)-N(6)      | 123.2(3)  |
| N(5)-C(30)-C(29)     | 117.9(3)  |
| N(6)-C(30)-C(29)     | 118.8(2)  |
| N(6)-C(31)-C(32)     | 114.1(3)  |
| N(6)-C(31)-H(31A)    | 108.7     |
| C(32)-C(31)-H(31A)   | 108.7     |
| N(6)-C(31)-H(31B)    | 108.7     |

|                     |          |
|---------------------|----------|
| C(32)-C(31)-H(31B)  | 108.7    |
| H(31A)-C(31)-H(31B) | 107.6    |
| C(31)-C(32)-H(32A)  | 109.5    |
| C(31)-C(32)-H(32B)  | 109.5    |
| H(32A)-C(32)-H(32B) | 109.5    |
| C(31)-C(32)-H(32C)  | 109.5    |
| H(32A)-C(32)-H(32C) | 109.5    |
| H(32B)-C(32)-H(32C) | 109.5    |
| C(34)-C(33)-N(6)    | 117.3(5) |
| C(34)-C(33)-H(33A)  | 108.0    |
| N(6)-C(33)-H(33A)   | 108.0    |
| C(34)-C(33)-H(33B)  | 108.0    |
| N(6)-C(33)-H(33B)   | 108.0    |
| H(33A)-C(33)-H(33B) | 107.2    |
| C(33)-C(34)-H(34A)  | 109.5    |
| C(33)-C(34)-H(34B)  | 109.5    |
| H(34A)-C(34)-H(34B) | 109.5    |
| C(33)-C(34)-H(34C)  | 109.5    |
| H(34A)-C(34)-H(34C) | 109.5    |
| H(34B)-C(34)-H(34C) | 109.5    |
| O(8)-C(35)-C(36)    | 112.2(4) |
| O(8)-C(35)-H(35A)   | 109.2    |
| C(36)-C(35)-H(35A)  | 109.2    |
| O(8)-C(35)-H(35B)   | 109.2    |
| C(36)-C(35)-H(35B)  | 109.2    |
| H(35A)-C(35)-H(35B) | 107.9    |
| C(35)-C(36)-H(36A)  | 109.5    |
| C(35)-C(36)-H(36B)  | 109.5    |
| H(36A)-C(36)-H(36B) | 109.5    |
| C(35)-C(36)-H(36C)  | 109.5    |
| H(36A)-C(36)-H(36C) | 109.5    |
| H(36B)-C(36)-H(36C) | 109.5    |
| O(10)-C(37)-O(9)    | 124.9(2) |
| O(10)-C(37)-C(38)   | 117.9(3) |
| O(9)-C(37)-C(38)    | 117.2(3) |
| C(39)-C(38)-C(43)   | 120.8(3) |
| C(39)-C(38)-C(37)   | 119.8(3) |
| C(43)-C(38)-C(37)   | 119.4(3) |
| C(38)-C(39)-C(40)   | 120.0(5) |
| C(38)-C(39)-H(39)   | 120.0    |

|                      |           |
|----------------------|-----------|
| C(40)-C(39)-H(39)    | 120.0     |
| C(41)-C(40)-C(39)    | 118.9(5)  |
| C(41)-C(40)-H(40)    | 120.6     |
| C(39)-C(40)-H(40)    | 120.6     |
| C(42)-C(41)-C(40)    | 121.5(4)  |
| C(42)-C(41)-H(41)    | 119.2     |
| C(40)-C(41)-H(41)    | 119.2     |
| C(41)-C(42)-C(43)    | 119.4(5)  |
| C(41)-C(42)-H(42)    | 120.3     |
| C(43)-C(42)-H(42)    | 120.3     |
| C(38)-C(43)-C(42)    | 119.3(4)  |
| C(38)-C(43)-H(43)    | 120.3     |
| C(42)-C(43)-H(43)    | 120.3     |
| O(11)-C(44A)-C(45A)  | 105.4(10) |
| O(11)-C(44A)-H(44A)  | 110.7     |
| C(45A)-C(44A)-H(44A) | 110.7     |
| O(11)-C(44A)-H(44B)  | 110.7     |
| C(45A)-C(44A)-H(44B) | 110.7     |
| H(44A)-C(44A)-H(44B) | 108.8     |
| O(11)-C(44B)-C(45B)  | 119.1(15) |
| O(11)-C(44B)-H(44C)  | 107.5     |
| C(45B)-C(44B)-H(44C) | 107.5     |
| O(11)-C(44B)-H(44D)  | 107.5     |
| C(45B)-C(44B)-H(44D) | 107.5     |
| H(44C)-C(44B)-H(44D) | 107.0     |
| C(44B)-C(45B)-H(45D) | 109.5     |
| C(44B)-C(45B)-H(45E) | 109.5     |
| H(45D)-C(45B)-H(45E) | 109.5     |
| C(44B)-C(45B)-H(45F) | 109.5     |
| H(45D)-C(45B)-H(45F) | 109.5     |
| H(45E)-C(45B)-H(45F) | 109.5     |

---

Symmetry transformations used to generate equivalent atoms:

#1 -x,-y+2,-z+2

Table S3. Bond lengths / Å and angles / ° for compound 4.

---

|              |            |
|--------------|------------|
| Mn(1)-O(2)   | 1.8918(18) |
| Mn(1)-O(1)   | 1.9154(17) |
| Mn(1)-O(7)   | 1.9154(19) |
| Mn(1)-N(1)   | 1.995(2)   |
| Mn(1)-O(11)  | 2.279(2)   |
| Mn(1)-O(4)#1 | 2.3673(19) |
| Mn(2)-O(1)   | 1.9010(17) |
| Mn(2)-O(4)   | 1.9244(18) |
| Mn(2)-O(3)   | 1.9599(19) |
| Mn(2)-N(3)   | 2.014(2)   |
| Mn(2)-O(8)   | 2.156(2)   |
| Mn(2)-O(3)#1 | 2.4293(18) |
| Mn(3)-O(6)   | 1.878(2)   |
| Mn(3)-O(1)   | 1.8853(19) |
| Mn(3)-O(5)   | 1.9187(19) |
| Mn(3)-N(5)   | 2.035(2)   |
| Mn(3)-O(10)  | 2.167(2)   |
| O(2)-C(1)    | 1.335(3)   |
| O(3)-N(1)    | 1.405(2)   |
| O(3)-Mn(2)#1 | 2.4293(18) |
| O(4)-C(12)   | 1.370(3)   |
| O(4)-Mn(1)#1 | 2.3673(19) |
| O(5)-N(3)    | 1.390(3)   |
| O(6)-C(23)   | 1.338(4)   |
| O(7)-N(5)    | 1.397(3)   |
| O(8)-C(34)   | 1.270(4)   |
| O(9)-C(34)   | 1.266(4)   |
| O(10)-C(41)  | 1.450(4)   |
| O(10)-H(10)  | 0.8505     |
| O(11)-C(44)  | 1.443(4)   |
| O(11)-H(11)  | 0.7260     |
| N(1)-C(7)    | 1.317(3)   |
| N(2)-C(7)    | 1.377(3)   |
| N(2)-C(8)    | 1.473(4)   |
| N(2)-C(10)   | 1.486(4)   |
| N(3)-C(18)   | 1.322(3)   |
| N(4)-C(19B)  | 1.179(18)  |
| N(4)-C(18)   | 1.382(5)   |

|              |           |
|--------------|-----------|
| N(4)-C(21A)  | 1.435(8)  |
| N(4)-C(19A)  | 1.681(9)  |
| N(4)-C(21B)  | 1.755(15) |
| N(5)-C(29)   | 1.316(3)  |
| N(6)-C(29)   | 1.388(3)  |
| N(6)-C(32)   | 1.473(4)  |
| N(6)-C(30)   | 1.489(4)  |
| C(1)-C(2)    | 1.414(4)  |
| C(1)-C(6)    | 1.430(4)  |
| C(2)-C(3)    | 1.380(4)  |
| C(2)-H(2)    | 0.9500    |
| C(3)-C(4)    | 1.398(4)  |
| C(3)-H(3)    | 0.9500    |
| C(4)-C(5)    | 1.389(4)  |
| C(4)-H(4)    | 0.9500    |
| C(5)-C(6)    | 1.405(4)  |
| C(5)-H(5)    | 0.9500    |
| C(6)-C(7)    | 1.501(3)  |
| C(8)-C(9)    | 1.517(4)  |
| C(8)-H(8A)   | 0.9900    |
| C(8)-H(8B)   | 0.9900    |
| C(9)-H(9A)   | 0.9800    |
| C(9)-H(9B)   | 0.9800    |
| C(9)-H(9C)   | 0.9800    |
| C(10)-C(11)  | 1.512(4)  |
| C(10)-H(10A) | 0.9900    |
| C(10)-H(10B) | 0.9900    |
| C(11)-H(11A) | 0.9800    |
| C(11)-H(11B) | 0.9800    |
| C(11)-H(11C) | 0.9800    |
| C(12)-C(17)  | 1.411(5)  |
| C(12)-C(13)  | 1.410(4)  |
| C(13)-C(14)  | 1.397(4)  |
| C(13)-H(13)  | 0.9500    |
| C(14)-C(15)  | 1.372(5)  |
| C(14)-H(14)  | 0.9500    |
| C(15)-C(16)  | 1.379(5)  |
| C(15)-H(15)  | 0.9500    |
| C(16)-C(17)  | 1.407(4)  |
| C(16)-H(16)  | 0.9500    |

|               |           |
|---------------|-----------|
| C(17)-C(18)   | 1.486(4)  |
| C(19A)-C(20A) | 1.541(12) |
| C(19A)-H(19A) | 0.9900    |
| C(19A)-H(19B) | 0.9900    |
| C(20A)-H(20A) | 0.9800    |
| C(20A)-H(20B) | 0.9800    |
| C(20A)-H(20C) | 0.9800    |
| C(19B)-C(20B) | 1.526(16) |
| C(19B)-H(19C) | 0.9900    |
| C(19B)-H(19D) | 0.9900    |
| C(20B)-H(20D) | 0.9800    |
| C(20B)-H(20E) | 0.9800    |
| C(20B)-H(20F) | 0.9800    |
| C(21A)-C(22)  | 1.552(10) |
| C(21A)-H(21A) | 0.9900    |
| C(21A)-H(21B) | 0.9900    |
| C(21B)-C(22)  | 1.380(14) |
| C(21B)-H(21C) | 0.9900    |
| C(21B)-H(21D) | 0.9900    |
| C(22)-H(22A)  | 0.9800    |
| C(22)-H(22B)  | 0.9800    |
| C(22)-H(22C)  | 0.9800    |
| C(22)-H(22D)  | 0.9600    |
| C(22)-H(22E)  | 0.9600    |
| C(22)-H(22F)  | 0.9600    |
| C(23)-C(24)   | 1.412(4)  |
| C(23)-C(28)   | 1.421(4)  |
| C(24)-C(25)   | 1.386(5)  |
| C(24)-H(24)   | 0.9500    |
| C(25)-C(26)   | 1.407(5)  |
| C(25)-H(25)   | 0.9500    |
| C(26)-C(27)   | 1.387(5)  |
| C(26)-H(26)   | 0.9500    |
| C(27)-C(28)   | 1.423(4)  |
| C(27)-H(27)   | 0.9500    |
| C(28)-C(29)   | 1.495(4)  |
| C(30)-C(31)   | 1.518(5)  |
| C(30)-H(30A)  | 0.9900    |
| C(30)-H(30B)  | 0.9900    |
| C(31)-H(31A)  | 0.9800    |

|                 |           |
|-----------------|-----------|
| C(31)-H(31B)    | 0.9800    |
| C(31)-H(31C)    | 0.9800    |
| C(32)-C(33)     | 1.533(5)  |
| C(32)-H(32A)    | 0.9900    |
| C(32)-H(32B)    | 0.9900    |
| C(33)-H(33A)    | 0.9800    |
| C(33)-H(33B)    | 0.9800    |
| C(33)-H(33C)    | 0.9800    |
| C(34)-C(35)     | 1.517(4)  |
| C(35)-C(36)     | 1.391(5)  |
| C(35)-C(40)     | 1.400(5)  |
| C(36)-C(37)     | 1.408(6)  |
| C(36)-H(36)     | 0.9500    |
| C(37)-C(38)     | 1.376(8)  |
| C(37)-H(37)     | 0.9500    |
| C(38)-C(39)     | 1.360(8)  |
| C(38)-H(38)     | 0.9500    |
| C(39)-C(40)     | 1.398(6)  |
| C(39)-H(39)     | 0.9500    |
| C(40)-H(40)     | 0.9500    |
| C(41)-C(42)     | 1.477(6)  |
| C(41)-C(43)     | 1.525(5)  |
| C(41)-H(41)     | 1.0000    |
| C(42)-H(42A)    | 0.9800    |
| C(42)-H(42B)    | 0.9800    |
| C(42)-H(42C)    | 0.9800    |
| C(43)-H(43A)    | 0.9800    |
| C(43)-H(43B)    | 0.9800    |
| C(43)-H(43C)    | 0.9800    |
| C(44)-C(46)     | 1.468(6)  |
| C(44)-C(45)     | 1.505(6)  |
| C(44)-H(44)     | 1.0000    |
| C(45)-H(45A)    | 0.9800    |
| C(45)-H(45B)    | 0.9800    |
| C(45)-H(45C)    | 0.9800    |
| C(46)-H(46A)    | 0.9800    |
| C(46)-H(46B)    | 0.9800    |
| C(46)-H(46C)    | 0.9800    |
| O(2)-Mn(1)-O(1) | 176.44(8) |



|                    |           |
|--------------------|-----------|
| O(2)-Mn(1)-O(7)    | 93.20(8)  |
| O(1)-Mn(1)-O(7)    | 90.07(8)  |
| O(2)-Mn(1)-N(1)    | 89.15(8)  |
| O(1)-Mn(1)-N(1)    | 87.77(8)  |
| O(7)-Mn(1)-N(1)    | 172.66(9) |
| O(2)-Mn(1)-O(11)   | 91.80(8)  |
| O(1)-Mn(1)-O(11)   | 86.37(8)  |
| O(7)-Mn(1)-O(11)   | 97.46(9)  |
| N(1)-Mn(1)-O(11)   | 89.41(8)  |
| O(2)-Mn(1)-O(4)#1  | 87.56(8)  |
| O(1)-Mn(1)-O(4)#1  | 93.74(7)  |
| O(7)-Mn(1)-O(4)#1  | 91.93(8)  |
| N(1)-Mn(1)-O(4)#1  | 81.22(8)  |
| O(11)-Mn(1)-O(4)#1 | 170.61(7) |
| O(1)-Mn(2)-O(4)    | 168.19(8) |
| O(1)-Mn(2)-O(3)    | 90.19(7)  |
| O(4)-Mn(2)-O(3)    | 91.21(8)  |
| O(1)-Mn(2)-N(3)    | 88.22(8)  |
| O(4)-Mn(2)-N(3)    | 89.15(9)  |
| O(3)-Mn(2)-N(3)    | 173.85(8) |
| O(1)-Mn(2)-O(8)    | 98.84(8)  |
| O(4)-Mn(2)-O(8)    | 92.79(8)  |
| O(3)-Mn(2)-O(8)    | 93.11(8)  |
| N(3)-Mn(2)-O(8)    | 93.00(9)  |
| O(1)-Mn(2)-O(3)#1  | 86.67(7)  |
| O(4)-Mn(2)-O(3)#1  | 82.02(7)  |
| O(3)-Mn(2)-O(3)#1  | 80.22(7)  |
| N(3)-Mn(2)-O(3)#1  | 93.75(8)  |
| O(8)-Mn(2)-O(3)#1  | 171.41(8) |
| O(6)-Mn(3)-O(1)    | 167.86(9) |
| O(6)-Mn(3)-O(5)    | 87.25(9)  |
| O(1)-Mn(3)-O(5)    | 91.41(8)  |
| O(6)-Mn(3)-N(5)    | 89.26(9)  |
| O(1)-Mn(3)-N(5)    | 88.78(8)  |
| O(5)-Mn(3)-N(5)    | 164.28(9) |
| O(6)-Mn(3)-O(10)   | 98.13(9)  |
| O(1)-Mn(3)-O(10)   | 94.02(8)  |
| O(5)-Mn(3)-O(10)   | 95.85(9)  |
| N(5)-Mn(3)-O(10)   | 99.81(9)  |
| Mn(3)-O(1)-Mn(2)   | 119.82(9) |

|                    |            |
|--------------------|------------|
| Mn(3)-O(1)-Mn(1)   | 120.73(9)  |
| Mn(2)-O(1)-Mn(1)   | 118.47(10) |
| C(1)-O(2)-Mn(1)    | 121.67(15) |
| N(1)-O(3)-Mn(2)    | 112.07(14) |
| N(1)-O(3)-Mn(2)#1  | 112.31(12) |
| Mn(2)-O(3)-Mn(2)#1 | 99.78(7)   |
| C(12)-O(4)-Mn(2)   | 116.11(17) |
| C(12)-O(4)-Mn(1)#1 | 119.28(15) |
| Mn(2)-O(4)-Mn(1)#1 | 120.13(8)  |
| N(3)-O(5)-Mn(3)    | 115.69(15) |
| C(23)-O(6)-Mn(3)   | 125.62(18) |
| N(5)-O(7)-Mn(1)    | 117.72(14) |
| C(34)-O(8)-Mn(2)   | 140.4(2)   |
| C(41)-O(10)-Mn(3)  | 130.3(2)   |
| C(41)-O(10)-H(10)  | 114.1      |
| Mn(3)-O(10)-H(10)  | 113.5      |
| C(44)-O(11)-Mn(1)  | 138.8(2)   |
| C(44)-O(11)-H(11)  | 112.3      |
| Mn(1)-O(11)-H(11)  | 108.9      |
| C(7)-N(1)-O(3)     | 117.6(2)   |
| C(7)-N(1)-Mn(1)    | 129.30(17) |
| O(3)-N(1)-Mn(1)    | 111.87(15) |
| C(7)-N(2)-C(8)     | 120.4(2)   |
| C(7)-N(2)-C(10)    | 120.6(2)   |
| C(8)-N(2)-C(10)    | 118.1(2)   |
| C(18)-N(3)-O(5)    | 117.3(2)   |
| C(18)-N(3)-Mn(2)   | 125.6(2)   |
| O(5)-N(3)-Mn(2)    | 115.27(15) |
| C(19B)-N(4)-C(18)  | 128.4(7)   |
| C(19B)-N(4)-C(21A) | 101.9(8)   |
| C(18)-N(4)-C(21A)  | 129.7(5)   |
| C(19B)-N(4)-C(19A) | 22.5(8)    |
| C(18)-N(4)-C(19A)  | 117.7(4)   |
| C(21A)-N(4)-C(19A) | 108.7(5)   |
| C(19B)-N(4)-C(21B) | 124.1(8)   |
| C(18)-N(4)-C(21B)  | 105.6(5)   |
| C(21A)-N(4)-C(21B) | 28.2(4)    |
| C(19A)-N(4)-C(21B) | 136.0(5)   |
| C(29)-N(5)-O(7)    | 115.2(2)   |
| C(29)-N(5)-Mn(3)   | 128.1(2)   |

|                    |            |
|--------------------|------------|
| O(7)-N(5)-Mn(3)    | 115.18(15) |
| C(29)-N(6)-C(32)   | 118.0(2)   |
| C(29)-N(6)-C(30)   | 121.9(3)   |
| C(32)-N(6)-C(30)   | 116.5(3)   |
| O(2)-C(1)-C(2)     | 117.8(2)   |
| O(2)-C(1)-C(6)     | 124.4(2)   |
| C(2)-C(1)-C(6)     | 117.7(2)   |
| C(3)-C(2)-C(1)     | 121.9(3)   |
| C(3)-C(2)-H(2)     | 119.1      |
| C(1)-C(2)-H(2)     | 119.1      |
| C(2)-C(3)-C(4)     | 120.4(3)   |
| C(2)-C(3)-H(3)     | 119.8      |
| C(4)-C(3)-H(3)     | 119.8      |
| C(5)-C(4)-C(3)     | 119.0(3)   |
| C(5)-C(4)-H(4)     | 120.5      |
| C(3)-C(4)-H(4)     | 120.5      |
| C(4)-C(5)-C(6)     | 121.9(3)   |
| C(4)-C(5)-H(5)     | 119.0      |
| C(6)-C(5)-H(5)     | 119.0      |
| C(5)-C(6)-C(1)     | 119.0(2)   |
| C(5)-C(6)-C(7)     | 118.8(2)   |
| C(1)-C(6)-C(7)     | 122.3(2)   |
| N(1)-C(7)-N(2)     | 123.9(2)   |
| N(1)-C(7)-C(6)     | 117.2(2)   |
| N(2)-C(7)-C(6)     | 118.8(2)   |
| N(2)-C(8)-C(9)     | 114.4(3)   |
| N(2)-C(8)-H(8A)    | 108.7      |
| C(9)-C(8)-H(8A)    | 108.7      |
| N(2)-C(8)-H(8B)    | 108.7      |
| C(9)-C(8)-H(8B)    | 108.7      |
| H(8A)-C(8)-H(8B)   | 107.6      |
| C(8)-C(9)-H(9A)    | 109.5      |
| C(8)-C(9)-H(9B)    | 109.5      |
| H(9A)-C(9)-H(9B)   | 109.5      |
| C(8)-C(9)-H(9C)    | 109.5      |
| H(9A)-C(9)-H(9C)   | 109.5      |
| H(9B)-C(9)-H(9C)   | 109.5      |
| N(2)-C(10)-C(11)   | 115.6(3)   |
| N(2)-C(10)-H(10A)  | 108.4      |
| C(11)-C(10)-H(10A) | 108.4      |

|                      |           |
|----------------------|-----------|
| N(2)-C(10)-H(10B)    | 108.4     |
| C(11)-C(10)-H(10B)   | 108.4     |
| H(10A)-C(10)-H(10B)  | 107.4     |
| C(10)-C(11)-H(11A)   | 109.5     |
| C(10)-C(11)-H(11B)   | 109.5     |
| H(11A)-C(11)-H(11B)  | 109.5     |
| C(10)-C(11)-H(11C)   | 109.5     |
| H(11A)-C(11)-H(11C)  | 109.5     |
| H(11B)-C(11)-H(11C)  | 109.5     |
| O(4)-C(12)-C(17)     | 122.1(3)  |
| O(4)-C(12)-C(13)     | 118.4(3)  |
| C(17)-C(12)-C(13)    | 119.4(3)  |
| C(14)-C(13)-C(12)    | 119.8(4)  |
| C(14)-C(13)-H(13)    | 120.1     |
| C(12)-C(13)-H(13)    | 120.1     |
| C(15)-C(14)-C(13)    | 121.3(3)  |
| C(15)-C(14)-H(14)    | 119.4     |
| C(13)-C(14)-H(14)    | 119.4     |
| C(14)-C(15)-C(16)    | 118.7(3)  |
| C(14)-C(15)-H(15)    | 120.6     |
| C(16)-C(15)-H(15)    | 120.6     |
| C(15)-C(16)-C(17)    | 122.8(4)  |
| C(15)-C(16)-H(16)    | 118.6     |
| C(17)-C(16)-H(16)    | 118.6     |
| C(16)-C(17)-C(12)    | 117.7(3)  |
| C(16)-C(17)-C(18)    | 119.9(3)  |
| C(12)-C(17)-C(18)    | 122.3(3)  |
| N(3)-C(18)-N(4)      | 123.3(3)  |
| N(3)-C(18)-C(17)     | 117.3(3)  |
| N(4)-C(18)-C(17)     | 119.4(3)  |
| C(20A)-C(19A)-N(4)   | 112.7(6)  |
| C(20A)-C(19A)-H(19A) | 109.0     |
| N(4)-C(19A)-H(19A)   | 109.0     |
| C(20A)-C(19A)-H(19B) | 109.0     |
| N(4)-C(19A)-H(19B)   | 109.0     |
| H(19A)-C(19A)-H(19B) | 107.8     |
| N(4)-C(19B)-C(20B)   | 109.1(13) |
| N(4)-C(19B)-H(19C)   | 109.9     |
| C(20B)-C(19B)-H(19C) | 109.9     |
| N(4)-C(19B)-H(19D)   | 109.9     |

|                      |          |
|----------------------|----------|
| C(20B)-C(19B)-H(19D) | 109.9    |
| H(19C)-C(19B)-H(19D) | 108.3    |
| C(19B)-C(20B)-H(20D) | 109.5    |
| C(19B)-C(20B)-H(20E) | 109.5    |
| H(20D)-C(20B)-H(20E) | 109.5    |
| C(19B)-C(20B)-H(20F) | 109.5    |
| H(20D)-C(20B)-H(20F) | 109.5    |
| H(20E)-C(20B)-H(20F) | 109.5    |
| N(4)-C(21A)-C(22)    | 114.3(6) |
| N(4)-C(21A)-H(21A)   | 108.7    |
| C(22)-C(21A)-H(21A)  | 108.7    |
| N(4)-C(21A)-H(21B)   | 108.7    |
| C(22)-C(21A)-H(21B)  | 108.7    |
| H(21A)-C(21A)-H(21B) | 107.6    |
| C(22)-C(21B)-N(4)    | 105.8(9) |
| C(22)-C(21B)-H(21C)  | 110.6    |
| N(4)-C(21B)-H(21C)   | 110.6    |
| C(22)-C(21B)-H(21D)  | 110.6    |
| N(4)-C(21B)-H(21D)   | 110.6    |
| H(21C)-C(21B)-H(21D) | 108.7    |
| C(21B)-C(22)-C(21A)  | 32.5(5)  |
| C(21B)-C(22)-H(22A)  | 109.1    |
| C(21A)-C(22)-H(22A)  | 109.5    |
| C(21B)-C(22)-H(22B)  | 79.7     |
| C(21A)-C(22)-H(22B)  | 109.5    |
| H(22A)-C(22)-H(22B)  | 109.5    |
| C(21B)-C(22)-H(22C)  | 134.1    |
| C(21A)-C(22)-H(22C)  | 109.5    |
| H(22A)-C(22)-H(22C)  | 109.5    |
| H(22B)-C(22)-H(22C)  | 109.5    |
| C(21B)-C(22)-H(22D)  | 108.9    |
| C(21A)-C(22)-H(22D)  | 108.9    |
| H(22A)-C(22)-H(22D)  | 0.8      |
| H(22B)-C(22)-H(22D)  | 110.2    |
| H(22C)-C(22)-H(22D)  | 109.3    |
| C(21B)-C(22)-H(22E)  | 106.3    |
| C(21A)-C(22)-H(22E)  | 131.8    |
| H(22A)-C(22)-H(22E)  | 108.7    |
| H(22B)-C(22)-H(22E)  | 28.4     |
| H(22C)-C(22)-H(22E)  | 83.8     |

|                     |          |
|---------------------|----------|
| H(22D)-C(22)-H(22E) | 109.5    |
| C(21B)-C(22)-H(22F) | 113.1    |
| C(21A)-C(22)-H(22F) | 83.6     |
| H(22A)-C(22)-H(22F) | 110.0    |
| H(22B)-C(22)-H(22F) | 130.7    |
| H(22C)-C(22)-H(22F) | 28.1     |
| H(22D)-C(22)-H(22F) | 109.5    |
| H(22E)-C(22)-H(22F) | 109.5    |
| O(6)-C(23)-C(24)    | 117.8(3) |
| O(6)-C(23)-C(28)    | 123.4(3) |
| C(24)-C(23)-C(28)   | 118.7(3) |
| C(25)-C(24)-C(23)   | 121.7(3) |
| C(25)-C(24)-H(24)   | 119.2    |
| C(23)-C(24)-H(24)   | 119.2    |
| C(24)-C(25)-C(26)   | 120.1(3) |
| C(24)-C(25)-H(25)   | 119.9    |
| C(26)-C(25)-H(25)   | 119.9    |
| C(27)-C(26)-C(25)   | 119.1(3) |
| C(27)-C(26)-H(26)   | 120.5    |
| C(25)-C(26)-H(26)   | 120.5    |
| C(26)-C(27)-C(28)   | 121.9(3) |
| C(26)-C(27)-H(27)   | 119.1    |
| C(28)-C(27)-H(27)   | 119.1    |
| C(23)-C(28)-C(27)   | 118.4(3) |
| C(23)-C(28)-C(29)   | 122.8(3) |
| C(27)-C(28)-C(29)   | 118.7(3) |
| N(5)-C(29)-N(6)     | 123.2(3) |
| N(5)-C(29)-C(28)    | 119.1(2) |
| N(6)-C(29)-C(28)    | 117.7(2) |
| N(6)-C(30)-C(31)    | 111.6(3) |
| N(6)-C(30)-H(30A)   | 109.3    |
| C(31)-C(30)-H(30A)  | 109.3    |
| N(6)-C(30)-H(30B)   | 109.3    |
| C(31)-C(30)-H(30B)  | 109.3    |
| H(30A)-C(30)-H(30B) | 108.0    |
| C(30)-C(31)-H(31A)  | 109.5    |
| C(30)-C(31)-H(31B)  | 109.5    |
| H(31A)-C(31)-H(31B) | 109.5    |
| C(30)-C(31)-H(31C)  | 109.5    |
| H(31A)-C(31)-H(31C) | 109.5    |

|                     |          |
|---------------------|----------|
| H(31B)-C(31)-H(31C) | 109.5    |
| N(6)-C(32)-C(33)    | 114.0(3) |
| N(6)-C(32)-H(32A)   | 108.8    |
| C(33)-C(32)-H(32A)  | 108.8    |
| N(6)-C(32)-H(32B)   | 108.8    |
| C(33)-C(32)-H(32B)  | 108.8    |
| H(32A)-C(32)-H(32B) | 107.7    |
| C(32)-C(33)-H(33A)  | 109.5    |
| C(32)-C(33)-H(33B)  | 109.5    |
| H(33A)-C(33)-H(33B) | 109.5    |
| C(32)-C(33)-H(33C)  | 109.5    |
| H(33A)-C(33)-H(33C) | 109.5    |
| H(33B)-C(33)-H(33C) | 109.5    |
| O(9)-C(34)-O(8)     | 125.7(3) |
| O(9)-C(34)-C(35)    | 118.2(3) |
| O(8)-C(34)-C(35)    | 116.1(3) |
| C(36)-C(35)-C(40)   | 119.6(3) |
| C(36)-C(35)-C(34)   | 120.2(3) |
| C(40)-C(35)-C(34)   | 120.1(3) |
| C(35)-C(36)-C(37)   | 119.1(5) |
| C(35)-C(36)-H(36)   | 120.4    |
| C(37)-C(36)-H(36)   | 120.4    |
| C(38)-C(37)-C(36)   | 120.5(5) |
| C(38)-C(37)-H(37)   | 119.8    |
| C(36)-C(37)-H(37)   | 119.8    |
| C(39)-C(38)-C(37)   | 120.6(4) |
| C(39)-C(38)-H(38)   | 119.7    |
| C(37)-C(38)-H(38)   | 119.7    |
| C(38)-C(39)-C(40)   | 120.4(5) |
| C(38)-C(39)-H(39)   | 119.8    |
| C(40)-C(39)-H(39)   | 119.8    |
| C(39)-C(40)-C(35)   | 119.8(5) |
| C(39)-C(40)-H(40)   | 120.1    |
| C(35)-C(40)-H(40)   | 120.1    |
| O(10)-C(41)-C(42)   | 110.7(3) |
| O(10)-C(41)-C(43)   | 109.7(3) |
| C(42)-C(41)-C(43)   | 112.6(4) |
| O(10)-C(41)-H(41)   | 107.9    |
| C(42)-C(41)-H(41)   | 107.9    |
| C(43)-C(41)-H(41)   | 107.9    |

|                     |          |
|---------------------|----------|
| C(41)-C(42)-H(42A)  | 109.5    |
| C(41)-C(42)-H(42B)  | 109.5    |
| H(42A)-C(42)-H(42B) | 109.5    |
| C(41)-C(42)-H(42C)  | 109.5    |
| H(42A)-C(42)-H(42C) | 109.5    |
| H(42B)-C(42)-H(42C) | 109.5    |
| C(41)-C(43)-H(43A)  | 109.5    |
| C(41)-C(43)-H(43B)  | 109.5    |
| H(43A)-C(43)-H(43B) | 109.5    |
| C(41)-C(43)-H(43C)  | 109.5    |
| H(43A)-C(43)-H(43C) | 109.5    |
| H(43B)-C(43)-H(43C) | 109.5    |
| O(11)-C(44)-C(46)   | 110.3(4) |
| O(11)-C(44)-C(45)   | 110.2(4) |
| C(46)-C(44)-C(45)   | 115.0(4) |
| O(11)-C(44)-H(44)   | 107.0    |
| C(46)-C(44)-H(44)   | 107.0    |
| C(45)-C(44)-H(44)   | 107.0    |
| C(44)-C(45)-H(45A)  | 109.5    |
| C(44)-C(45)-H(45B)  | 109.5    |
| H(45A)-C(45)-H(45B) | 109.5    |
| C(44)-C(45)-H(45C)  | 109.5    |
| H(45A)-C(45)-H(45C) | 109.5    |
| H(45B)-C(45)-H(45C) | 109.5    |
| C(44)-C(46)-H(46A)  | 109.5    |
| C(44)-C(46)-H(46B)  | 109.5    |
| H(46A)-C(46)-H(46B) | 109.5    |
| C(44)-C(46)-H(46C)  | 109.5    |
| H(46A)-C(46)-H(46C) | 109.5    |
| H(46B)-C(46)-H(46C) | 109.5    |

---

Symmetry transformations used to generate equivalent atoms:

#1 -x+1,-y+1,-z+1
